# Supplementary material
Source: MDPI journal article supplement (https://www.mdpi.com/2073-4441/15/6/1018)
Supplement: s1 [file s1]

## Supplemental material

### Tracing COVID-19 Trails in Wastewater: a systematic review of SARS-CoV-2 Surveillance with Viral Variants

Ananda Tiwari<sup>a,\*</sup>, Sangeet Adhikari<sup>b</sup>, Shuxin Zhang<sup>c</sup>, Tamunobelem B. Solomon<sup>d</sup>, Anssi Lipponen<sup>a</sup>, MD Aminul Islam<sup>e,f</sup>, Ocean Thakali<sup>g</sup>, Sarawut Sangkham<sup>h</sup>, Mohamed N.F. Shaheen<sup>i</sup>, Guangming Jiang<sup>c,j</sup>, Eiji Haramoto<sup>k</sup>, Payal Mazumder<sup>l</sup>, Bikash Malla<sup>k</sup>, Manish Kumar<sup>l,m</sup>, Tarja Pitkänen<sup>a,n</sup>, Samendra P. Sherchan<sup>d,o,\*</sup>

<sup>a</sup>Department of Health Security, Expert Microbiology Unit, Finnish Institute for Health and Welfare, Kuopio, Finland

<sup>b</sup>Thermo Fisher Scientific, San Jose, CA, USA

<sup>c</sup>School of Civil, Mining, Environmental and Architecture Engineering, University of Wollongong, Australia

<sup>d</sup>BioEnvironmental Science, Morgan State University, Baltimore, MD, USA.

<sup>e</sup>COVID-19 Diagnostic Lab, Department of Microbiology, Noakhali Science and Technology University, Noakhali, Bangladesh

<sup>f</sup>Advanced Molecular Lab, Department of Microbiology, President Abdul Hamid Medical College, Karimganj, Kishoreganj, Bangladesh

<sup>g</sup>Department of Civil Engineering, University of Ottawa, Ottawa, Canada

<sup>h</sup>Department of Environmental Health, School of Public Health, University of Phayao, Muang District, Phayao Thailand.

<sup>i</sup>Department of Water Pollution Research, Environment and Climate Change Research Institute, National Research Center, Giza, Egypt.

<sup>j</sup>Illawarra Health and Medical Research Institute (IHMRI), University of Wollongong, Wollongong, Australia

<sup>k</sup>Interdisciplinary Center for River Basin Environment, University of Yamanashi, 4-3-11 Takeda, Kofu, Yamanashi, Japan

<sup>l</sup>Sustainability Cluster, School of Engineering, UPES, Dehradun, Uttarakhand, India

<sup>m</sup>Escuela de Ingeniería y Ciencias, Tecnológico de Monterrey, Campus Monterrey, Monterrey, Nuevo Leon, Mexico

<sup>n</sup>Department of Food Hygiene and Environmental Health, Faculty of Veterinary Medicine, University of Helsinki, Helsinki, Finland

<sup>o</sup>Department of Environmental Health Sciences, School of Public Health and Tropical Medicine, Tulane University, New Orleans, LA, USA.

\*Corresponding Authors: Ananda Tiwari, AT (E-mail: [ananda.tiwari@thl.fi](mailto:ananda.tiwari@thl.fi), Tel: +358442535468) and Samendra Sherchan, SS: (E-mail: [sshercha@tulane.edu](mailto:sshercha@tulane.edu) Tel: +1-5049887283).

**Table S1.** Summary of literature data on the detection of SARS-CoV-2 variants by wastewater surveillance

| Country                                   | Wastewater sample/<br>Virus concentration<br>method       | RNA extraction<br>kits Used                                                                               | Genes<br>targeted | Method<br>(PCR or<br>sequencing)                                                                                        | SARS-CoV-2<br>variants                               | Major Findings                                                                                                                                                                                                                                          |
|-------------------------------------------|-----------------------------------------------------------|-----------------------------------------------------------------------------------------------------------|-------------------|-------------------------------------------------------------------------------------------------------------------------|------------------------------------------------------|---------------------------------------------------------------------------------------------------------------------------------------------------------------------------------------------------------------------------------------------------------|
| USA,<br>(Rothman et al.,<br>2021)         | Composite /<br>mixed cellulose ester<br>membranes         | BioMérieux<br>NucliSENS<br>extraction<br>kit with magnetic<br>bead capture<br>(bioMérieux,<br>Durham, NC) | <sup>a</sup> N1   | SARS-CoV-2 RNA<br>quantification: RT-<br>ddPCR;<br>Identification of<br>novel SNVs:<br>metatranscriptomic<br>sequencing | Single-nucleotide<br>variants (SNVs)                 | -2,558 SNVs (2,002<br>unique) have been<br>detected.<br>-Although wastewater<br>sequencing is a tool for<br>detecting SNVs across<br>large catchment areas, it<br>is not useful for<br>determining the true<br>prevalence of SNVs.                      |
| USA,<br>(Crits-Christoph<br>et al., 2021) | Composite /<br>ultrafiltration                            | Qiagen AllPrep<br>DNA/RNA minikit                                                                         | <sup>a</sup> N1   | SARS-CoV-2 RNA<br>quantification: RT-<br>qPCR; Identification<br>of novel SNVs:<br>metatranscriptomic<br>sequencing     | Single-nucleotide<br>variants (SNVs)                 | -Wastewater detection of<br>SARS-CoV-2 variants<br>was concordant with<br>clinical data.                                                                                                                                                                |
| USA,<br>(Swift et al.,<br>2021)           | Composite / centrifugation<br>followed by ultrafiltration | Qiagen AllPrep<br>PowerViral<br>extraction kit                                                            | <sup>b</sup> S    | Sequencing                                                                                                              | B.1.526 (Iota),<br>B.1.617.2 (Delta),<br>P.1 (Gamma) | -Wastewater detection of<br>SARS-CoV-2 variants<br>was concordant with<br>clinical data.                                                                                                                                                                |
| USA,<br>(Gregory et al.,<br>2021)         | Composite / polyethylene<br>glycol precipitation          | QIAamp Viral RNA<br>Mini Kit (Qiagen,<br>Germantown, MD,<br>USA)                                          | <sup>b</sup> S    | RT-PCR-based<br>Illumina MiSeq<br>sequencing                                                                            | B.1.1.7 (Alpha), and<br>P.1 (Gamma)                  | -A novel program<br>called SAM Refiner<br>was developed for<br>detecting novel variants<br>in wastewater and<br>removing chimeric<br>errors generated from<br>PCR.<br>-Reported the<br>emergence of B.1.1.7<br>(Alpha) and P.1<br>(Gamma) in wastewater |

|                               |                                                                                 |                                                                       |                                                                                                                                              |                                                                                                       |                                                 |                                                                                                                                                                                                                                                                                                             |
|-------------------------------|---------------------------------------------------------------------------------|-----------------------------------------------------------------------|----------------------------------------------------------------------------------------------------------------------------------------------|-------------------------------------------------------------------------------------------------------|-------------------------------------------------|-------------------------------------------------------------------------------------------------------------------------------------------------------------------------------------------------------------------------------------------------------------------------------------------------------------|
| USA,<br>(Ash et al., 2021)    | Grab / filtration followed by ultra-centrifugation                              | Qiagen QIAamp viral RNA mini kit                                      | <sup>a</sup> N1and N3                                                                                                                        | SARS-CoV-2 RNA quantification: RT-qPCR; Variant analysis: tiling PCR-based Illumina sequencing        | B.1.2 and the GH neighbor clade                 | -B.1.2 variants were circulated in the study area (large college campuses).                                                                                                                                                                                                                                 |
| USA,<br>(Lee et al., 2021)    | Composite / filtration followed by ultra-centrifugation                         | RNeasy kit (Qiagen, USA)                                              | S genes (69/70 Del, Y144del, and A570D)                                                                                                      | One-Step RT-qPCR                                                                                      | B.1.1.7 (Alpha) (69/70 Del, Y144del, and A570D) | -Developed an allele-specific RT-qPCR method to detect and quantify B.1.1.7 SARS-CoV-2 variant and wild type in wastewater.<br><br>-The sum of concentration by CDC N1 and N2 assays matched the total concentration of B.1.1.7 and wild-type sequences obtained by this newly developed AS RT-qPCR method. |
| USA,<br>(Rainey et al., 2022) | Composites / filtration through cellulose ester electronegative membrane filter | Zymo Quick-DNA/RNA Viral MagBead kit (Zymo Research, Irvine, CA, USA) | <sup>a</sup> N2                                                                                                                              | SARS-CoV-2 RNA quantification: RT-qPCR' SARS-CoV-2 variants detection: RT-PCR-based Sanger sequencing | B.1.375, B.1                                    | -SARS-CoV-2 was detected in 28.8% (15/52) of wastewater samples tested.<br>-No significant association between SARS-CoV-2 concentrations in wastewater and ambient temperature.                                                                                                                             |
| USA,<br>(Boehm et al., 2022)  | Composite (wastewater settled solids) / centrifugation                          | Chemagic Viral DNA/RNA 300 kit                                        | <sup>b</sup> LPPA24S: a 9 bp deletion of the BA.2 characteristic mutation; S:477-505: a region of five adjacent SNPs common to BA.1 and BA.2 | RT-ddPCR                                                                                              | BA.1 (Omicron), BA.2 (Omicron)                  | -Wastewater analysis showed regional replacement of Omicron variants BA.1 with BA.2, which was in agreement with clinical sequencing data.                                                                                                                                                                  |

|                                 |                                                                              |                                                                                   |                                             |                                                                                                                      |                                                                                                                                      |                                                                                                                                                                                                                                                                                                                                                                      |
|---------------------------------|------------------------------------------------------------------------------|-----------------------------------------------------------------------------------|---------------------------------------------|----------------------------------------------------------------------------------------------------------------------|--------------------------------------------------------------------------------------------------------------------------------------|----------------------------------------------------------------------------------------------------------------------------------------------------------------------------------------------------------------------------------------------------------------------------------------------------------------------------------------------------------------------|
| USA,<br>(Li et al., 2021)       | Grab / ultrafiltration                                                       | AllPrep<br>PowerViral<br>DNA/RNA kit<br>(QIAGEN, Inc.,<br>Germantown, MD,<br>USA) | <sup>a</sup> N1 and N2                      | SARS-CoV-2 RNA<br>quantification: RT-<br>qPCR; Identification<br>of variants: RT-PCR<br>based Illumina<br>sequencing | B.1.1.7 (Alpha),<br>B.1.617.2 (Delta),<br>B.1.2,<br>B.1.429 (Epsilon)<br>P.1 (Gamma)                                                 | -The concentrations of<br>viral loads in<br>wastewater ranged<br>from $3.00 \times 10^2$ to $9.28 \times 10^5$ GC/L.<br>-The viral<br>concentration in the<br>wastewater positively<br>correlates with the<br>number of COVID-19<br>cases.<br>-Alpha (B.1.1.7) and<br>Delta (B.1.617.2) were<br>the dominant variants<br>in both wastewater and<br>clinical samples. |
| USA,<br>(Vo, et al.,<br>2022a)  | Grab, composite<br>/ ultrafiltration                                         | N/A                                                                               | <sup>a</sup> orf1a, E_Sarbeco, N1<br>and N2 | SARS-CoV-2 RNA<br>quantification: RT-<br>qPCR; Detection of<br>a variant of concern:<br>Illumina sequencing          | B.1.1.7 (Alpha),<br>B.1.429 (Epsilon)                                                                                                | -SARS-CoV-2 RNA<br>loads (ranging from 4.3<br>log <sub>10</sub> GC/L to 8.7<br>log <sub>10</sub> GC/L)<br>closely matched<br>COVID-19 incidence.<br>-B.1.1.7 and B.1.429<br>variants were detected<br>one month earlier than<br>clinical testing.                                                                                                                    |
| USA,<br>(Ai et al., 2021)       | Composite / electropositive<br>membrane (ViroCap,<br>Scientific Methods, US) | RNeasy Power<br>Microbiome kit<br>(QIAGEN,<br>Germantown, MD,<br>USA)             | N1, N2 & E genes                            | Next-<br>Generation<br>Sequencing (NGS)<br>by hybridization<br>and/or amplicon<br>methods                            | B.1.427/429<br>(Epsilon)                                                                                                             | -Reported WWS was in<br>concordance with<br>clinical cases.                                                                                                                                                                                                                                                                                                          |
| USA,<br>(Wolfe et al.,<br>2022) | Composite /<br>centrifugation                                                | Chemagic Viral<br>DNA/RNA 300 kit<br>H96 (Perkin Elmer)                           | N and S genes                               | RT-ddPCR                                                                                                             | B.1.1.7 (Alpha),<br>B.1.351 (Beta),<br>P.1 (Gamma),<br>B.1.617.2 (Delta),<br>B.1.621 (Mu),<br>C.37 (Lambda) &<br>B.1.1.529 (Omicron) | -Developed mutation-<br>specific digital RT-<br>PCR assays and<br>quantified those<br>mutations in<br>wastewater-settled<br>solids samples<br>collected from publicly<br>owned treatment                                                                                                                                                                             |

|                            |                                    |                                                                             |                        |                                                                                                                                                                                |                                        |                                                                                                                                                                                          |
|----------------------------|------------------------------------|-----------------------------------------------------------------------------|------------------------|--------------------------------------------------------------------------------------------------------------------------------------------------------------------------------|----------------------------------------|------------------------------------------------------------------------------------------------------------------------------------------------------------------------------------------|
|                            |                                    |                                                                             |                        |                                                                                                                                                                                |                                        | works.<br>-Normalized concentrations of these mutations by a SARS-CoV-2 N gene correlated with regional estimates of clinical infections caused by each VOC.                             |
| USA, (Sutton et al., 2022) | Composite / electronegative filter | MagMAX Viral/Pathogen Nucleic Acid Isolation kit (Thermo Fisher Scientific) | N and S genes          | SARS-CoV-2 quantification: dd-RT-PCR; Variant analysis: Amplicon-based sequencing                                                                                              | B.1.351 (Beta)                         | -Reported the B.1.351 variant in wastewater 12 days before the detection in clinical specimens.                                                                                          |
| USA, (Yu et al., 2022)     | Grab / centrifugation              | Chemagic Viral DNA/RNA 300 kit H96                                          | Nucleoprotein (N) gene | Targeted digital RT-PCR mutation assay                                                                                                                                         | B.1.1.7 (Alpha) and B.1.617.2 (Delta)  | -Variants in WW measured were strongly correlated with clinically reported cases of each variant $r = 0.82 - 0.97$ .<br>- Variants were detected 2 weeks earlier than in clinical cases. |
| USA, (Oh et al., 2022)     | Composite / centrifugation         | QIAamp Viral RNA minikit                                                    | N1                     | SARS-CoV-2 RNA quantification: RT-qPCR<br>Variant analysis: RT-qPCR targeting S: A570D (Alpha) and S: P681R (Delta) mutations followed by confirmation via Illumina sequencing | B.1.1.7 (Alpha) and B.1.617.2 (Delta). | -Developed RT-qPCR assay to detect Alpha and Delta variants in wastewater.<br>-The assay was used for monitoring Alpha and Delta variants and further confirmed by sequencing.           |
| USA, (Boehm et al., 2022)  | Composite / ultracentrifugation    | Chemagic Viral DNA/RNA 300 kit H96                                          | N & S genes            | ddRT-PCR                                                                                                                                                                       | Omicron BA.1 and BA.2                  | -Reported the VOC with WWS & reported the dynamics between two variants.                                                                                                                 |

|                                  |                                                                                 |                                                                                                                                                                       |                                                                |                                                                   |                                                                                                                                               |                                                                                                                                                                                                                   |
|----------------------------------|---------------------------------------------------------------------------------|-----------------------------------------------------------------------------------------------------------------------------------------------------------------------|----------------------------------------------------------------|-------------------------------------------------------------------|-----------------------------------------------------------------------------------------------------------------------------------------------|-------------------------------------------------------------------------------------------------------------------------------------------------------------------------------------------------------------------|
| USA,<br>(Brumfield et al., 2022) | Composite / NA                                                                  | QIAamp Viral RNA minikit                                                                                                                                              | Nucleocapsid (N protein)                                       | Targeted SARS-CoV-2 sequencing                                    | B.1.351 (Beta, V2),<br>B.1.1.7 (Alpha, V1)                                                                                                    | -Reported important genetic mutations (K417N, D614G, P681H, T716I, S982A, and D1118H).                                                                                                                            |
| USA,<br>(Smyth et al., 2022)     | Composite / ultracentrifugation                                                 | Centrifuged, then the supernatant was filtered and NaCl and PEG were added to the filtrate and centrifuged, and the pellet was resuspended in TRIzol                  | S genes                                                        | Targeted SARS-CoV-2 sequencing                                    | B.1.1.7 (Alpha),<br>B.1.351 (Beta),<br>B.1.427/B.1.429 (Epsilon),<br>B.1.526(Iota),<br>(B.1.617.2(Delta),<br>B.1.617.1 (Kappa),<br>P.1 (Gamma | -Clinical sequences submitted to GISAID from the study area were highly concordant with wastewater analysis samples.<br>-Even new variants were detected in wastewater which were not caught in clinical testing. |
| USA,<br>(Silva et al., 2022)     | Composite / ultracentrifugation                                                 | Commercial kits: MagMAX™ Viral/Pathogen Nucleic Acid Isolation kit (Applied Biosystems) and MagMAX™ Microbiome Ultra Nucleic Acid Isolation kit (Applied Biosystems). | TaqMan RT-PCR assays targeted ORF1ab, S-protein, and N-protein | RT-qPCR combine with targeted SARS-CoV-2 sequencing               | B.1.1.7 (Alpha)<br>B.1.617.2 (Delta),<br>B.1.1.529 (Omicron)                                                                                  | - SARS-CoV-2 variants in wastewater were in concordance with COVID-19 prevalence.<br>-WWS identified hotspots in neighborhoods and determine circulating variants.                                                |
| USA,<br>(Layton et al., 2022)    | Composite / electronegative membrane filtration and centrifugal ultrafiltration | MagMAX Viral/Pathogen kit                                                                                                                                             | N1 and N2                                                      | SARS-CoV-2 RNA: RT-ddPCR<br>Variant analysis: Illumina sequencing | B.1 and B.1.399                                                                                                                               | - SARS-CoV-2 variants in wastewater were in concordance with COVID-19 prevalence.<br>-WWS identified hotspots in neighborhoods and determine circulating variants.                                                |
| Canada,<br>(Lin et al., 2021)    | N/A<br><br>Ultrafiltration                                                      | N/A                                                                                                                                                                   | <sup>a</sup> N1                                                | Multiplex tiling PCR-based sequencing                             | B.1.1.7 (Alpha),<br>P.1 (Gamma),<br>B.1.351 (Beta)                                                                                            | -Optimized the primer scheme (400 bp) and sample matrix (influent)                                                                                                                                                |

|                                      |                                         |                                                         |                                                          |                                                                                                                                                      |                                                                                                                 |                                                                                                                                                                                                                                                |
|--------------------------------------|-----------------------------------------|---------------------------------------------------------|----------------------------------------------------------|------------------------------------------------------------------------------------------------------------------------------------------------------|-----------------------------------------------------------------------------------------------------------------|------------------------------------------------------------------------------------------------------------------------------------------------------------------------------------------------------------------------------------------------|
|                                      |                                         |                                                         |                                                          |                                                                                                                                                      |                                                                                                                 | for detecting the emergence of new variants.<br>-B.1.1.7 and P.1 were the dominant lineages<br>-SARS-CoV-2 variants in wastewater were in concordance with COVID-19 prevalence.                                                                |
| Canada, (Graber et al., 2021)        | Composite centrifugation                | RNeasy PowerMicrobiome kit (Qiagen, Germantown, MD)     | <sup>a</sup> N1; <sup>b</sup> D3(a deletion at nt 28271) | Total SARS-CoV-2 N gene quantification: RT-ddPCR.<br>Detection of non-B.1.1.7 alleles (D3) or only the B.1.1.7 allele (D3L): allele-specific RT-qPCR | Quantification of B.1.1.7 (Alpha) versus non-B.1.1.7 allele frequency                                           | -SARS-CoV-2 variants in wastewater were in concordance with COVID-19 prevalence.<br>-This study allowed the quantification of B.1.1.7 versus non-B.1.1.7 allele frequency in wastewater without employing quantitative RT-PCR standard curves. |
| Canada, (Corchis-Scott et al., 2021) | Grab / ultrafiltration                  | AllPrep PowerViral DNA/RNA kit (Qiagen, Germantown, MD) | <sup>a</sup> N1; <sup>b</sup> N-D3L                      | RT-qPCR                                                                                                                                              | B.1.1.7 (Alpha)                                                                                                 | -Reported B.1.1.7 in wastewater was concordant with clinical diagnosis by targeting the D3L mutation on the N gene.                                                                                                                            |
| Canada, (Hubert et al., 2022)        | Composite/ ultrafiltration              | QIAamp viral RNA minikit (Qiagen)                       | N1 and N2                                                | RT-PCR and metagenomic sequencing                                                                                                                    | BA.1 (Omicron), B.1.617.2 (Delta variant by targeting mutations R203K/G204R)                                    | -Omicron and Delta variants were identified across 30 municipalities                                                                                                                                                                           |
| Canada, (Lawal et al., 2022)         | Composite / nanotrap magnetic particles | QIAamp Viral RNA minikit (Qiagen)                       | N1 and N2                                                | SARS-CoV-2 RNA: RT-qPCR<br>Variant analysis: Illumina sequencing                                                                                     | Delta sub-lineages AY.25, AY.25.3, B.1.617.2, AY.103, AY.121, AY.4, AY.74, AY.31, AY.25.1) and BA.1.1 (Omicron) | -Multiple VOCs were reported in wastewater.                                                                                                                                                                                                    |
| Canada,                              | Composite / polyethylene                | RNeasy Power                                            | N1, N2, and N200                                         | SARS-CoV-2 RNA:                                                                                                                                      | Delta sub-lineages                                                                                              | -WWS in large cities                                                                                                                                                                                                                           |

|                                       |                            |                                                                                               |                                                           |                                                                                                                                                                                                                                                                                               |                                                                                      |                                                                                                                                                                                                                                                                                                                                                                                                                   |
|---------------------------------------|----------------------------|-----------------------------------------------------------------------------------------------|-----------------------------------------------------------|-----------------------------------------------------------------------------------------------------------------------------------------------------------------------------------------------------------------------------------------------------------------------------------------------|--------------------------------------------------------------------------------------|-------------------------------------------------------------------------------------------------------------------------------------------------------------------------------------------------------------------------------------------------------------------------------------------------------------------------------------------------------------------------------------------------------------------|
| (Oloye et al., 2022)                  | glycol precipitation       | Microbiome kit                                                                                |                                                           | RT-qPCR<br>Variant analysis:<br>Illumina sequencing                                                                                                                                                                                                                                           | AY.12, AY.25,<br>AY.27, and AY.93,<br>and Omicron sub-<br>lineages BA.1 and<br>BA.2. | detects variants of<br>concern earlier than in<br>small cities.<br>-SARS-CoV-2 load in<br>wastewater during the<br>Omicron wave was<br>higher than in Delta.                                                                                                                                                                                                                                                      |
| Canada,<br>(Peng et al.,<br>2022)     | Composite / centrifugation | RNeasy Power<br>Microbiome kit                                                                | N1 and N2                                                 | SARS-CoV-2 RNA<br>quantification: RT-<br>qPCR; Variant<br>analysis: RT-qPCR<br>targeted mutations<br>D3L (Alpha) and<br>multiplexed assay to<br>detect Omicron,<br>Alpha, Delta,<br>Illumina sequencing,<br>and nested PCR-<br>liquid<br>chromatography-<br>mass spectrometry<br>(nPCR-LC-MS) | B.1.1.7 (Alpha)<br><br>Omicron sub-lineages<br>BA.1 and BA.2.                        | - nPCR-LC-MS<br>allowed distinguishing<br>between the presence<br>or deletion D3L<br>mutation compared to<br>allele-specific qPCR,<br>indicating higher<br>selectivity.<br>- nPCR-LC-MS was<br>more sensitive in<br>detecting Omicron than<br>sequencing.<br>- nPCR-LC-MS is an<br>effective tool to<br>measure VOCs for<br>WWS                                                                                   |
| Canada,<br>(Peterson et al.,<br>2022) | Composite / centrifugation | Magna Pure 96<br>DNA and Viral NA<br>Large Volume kit<br>(Roche<br>Diagnostics, Laval,<br>QC) | <sup>a</sup> N; <sup>b</sup> N501Y, S 69-70<br>del, N-D3L | RT-qPCR                                                                                                                                                                                                                                                                                       | B.1.1.7 (Alpha),<br>B.1.351 (Beta),<br>P.1 (Gamma)                                   | -RT-qPCR assay was<br>developed for detecting<br>new variants<br>-B.1.1.7 (75% of the<br>signal detected) was<br>dominant in wastewater<br>-The sensitivities and<br>specificities were<br>96.1% and 95.2% for<br>SN501Y, 96.1% and<br>93.4% for Sdel, and<br>85.7% and 89.8% for<br>ND3L, respectively,<br>when compared with<br>N1 as the good<br>standard for the<br>qualitative detection of<br>SARS-CoV-2 in |

|                                 |                                                                      |                                    |                                                                                                |                                                                                                                                         |                                          |                                                                                                                                                                                                                                                                                                                          |
|---------------------------------|----------------------------------------------------------------------|------------------------------------|------------------------------------------------------------------------------------------------|-----------------------------------------------------------------------------------------------------------------------------------------|------------------------------------------|--------------------------------------------------------------------------------------------------------------------------------------------------------------------------------------------------------------------------------------------------------------------------------------------------------------------------|
|                                 |                                                                      |                                    |                                                                                                |                                                                                                                                         |                                          | wastewater.                                                                                                                                                                                                                                                                                                              |
| UK,<br>(Martin et al.,<br>2020) | Composite / filtration-<br>centrifugation                            | N/A                                | <sup>a</sup> RdRP and E.<br><sup>b</sup> different regions across<br>the SARS-CoV-2<br>genome. | SARS-CoV-2 RNA<br>quantification: RT-<br>qPCR.<br>Sequence variation<br>analysis: RT-PCR<br>and nPCR based<br>NGS Sanger<br>sequencing. | G614 (Delta)                             | -The variants in<br>wastewater were<br>coherent with clinical<br>cases.<br>-Lockdown measures<br>reduced the<br>concentrations of viral<br>RNA in wastewater.<br>-G614 was prevalent in<br>England at the time of<br>the study.                                                                                          |
| UK,<br>(Wilton et al.,<br>2021) | Composite / filtration-<br>centrifugation                            | High-Pure Viral<br>RNA kit (Roche) | <sup>b</sup> RdRP and ORF8b                                                                    | RT-PCR and nPCR-<br>based NGS Sanger<br>sequencing                                                                                      | B.1.1.7 (Alpha)                          | -Reported B.1.1.7<br>variant for the first time<br>in south-east England<br>wastewater<br>-Reported B.1.1.7<br>variants in wastewater<br>before the detection in<br>clinical specimens<br>-Prevalence of SARS-<br>CoV-2 alpha variant<br>(B.1.1.7 lineage) in<br>wastewater<br>corresponded with<br>clinical suspicions. |
| UK,<br>(Mishra et al.,<br>2021) | Composite / filtration<br>followed by centrifugal<br>ultrafiltration | High-Pure Viral<br>RNA kit (Roche) | RdRP and E                                                                                     | SARS-CoV-2 RNA<br>quantification: RT-<br>qPCR<br>Variant analysis:<br>Illumina sequencing                                               | B.1.1.7 (Alpha) and<br>B.1.617.2 (Delta) | -Variant detection in<br>wastewater was<br>concordant with clinical<br>cases.<br>-The shift of Alpha to<br>Delta variants in<br>communities was<br>reflected with WWS.                                                                                                                                                   |

|                                         |                                                                 |                                                                                                                                                           |                                                              |                                                                                                        |                                                                      |                                                                                                                                                                                                                                                                      |
|-----------------------------------------|-----------------------------------------------------------------|-----------------------------------------------------------------------------------------------------------------------------------------------------------|--------------------------------------------------------------|--------------------------------------------------------------------------------------------------------|----------------------------------------------------------------------|----------------------------------------------------------------------------------------------------------------------------------------------------------------------------------------------------------------------------------------------------------------------|
| Spain,<br>(Carcereny et al., 2021)      | Grab / aluminum hydroxide adsorption-precipitation              | Maxwell RSC PureFood GMO and Authentication kit (Promega Corporation, Madison, US); NucleoSpin RNA Virus kit (Macherey-Nagel GmbH & Co., Düren, Germany), | <sup>a</sup> N1, <sup>b</sup> S ( $\Delta$ HV69/70 deletion) | Duplex RT-qPCR                                                                                         | B.1.1.7 (Alpha)                                                      | -SARS-CoV-2 B.1.1.7 variant was reported in 91% of wastewater samples.<br>-Variant detection in wastewater was concordant with clinical cases.                                                                                                                       |
| Spain,<br>(Carcereny et al., 2022)      | Composite / aluminum hydroxide adsorption-precipitation         | Maxwell® RSC PureFood GMO and Authentication kit (Promega)                                                                                                | <sup>a</sup> N1, <sup>b</sup> S ( $\Delta$ HV69/70 deletion) | Duplex RT-qPCR                                                                                         | B.1.1.7 (Alpha)                                                      | -A range of one to eight Alpha signature markers were detected in different WWTPs<br>-There was a significant positive correlation between the log10 N1 GC per 100,000 inhabitants in sewage and the total number of clinical cases.                                 |
| Spain,<br>(Pérez-Cataluña et al., 2022) | Grab / cetyltrimethylammonium bromide and proteinase K solution | Maxwell RSC Pure Food GMO and authentication kit (Promega)                                                                                                | <sup>a</sup> N1; <sup>b</sup> ORF1a, S, ORF8, and N          | SARS-CoV-2 RNA quantification: RT-qPCR;<br>Variants analysis: multiplex PCR-based Illumina sequencing. | B.1.1.7 (Alpha)                                                      | -Variant was detected in wastewater before the detection in clinical specimens.<br>-The highest frequency of mutations was present in nucleocapsid (60% of the samples), then in the ORF8 region (45% of the samples), and the lowest mutations were found in ORF1a. |
| Spain,<br>(Novoa et al., 2022)          | Grab and composite / AlCl <sub>3</sub> precipitation            | QIAamp Viral RNA minikit and Maxwell RSC Pure Food GMO and                                                                                                | N, N1, N2, E                                                 | SARS-CoV-2 RNA quantification: RT-qPCR<br>Variant analysis:                                            | 20E (EU1), 20A.EU2, B.1.1.7 (Alpha), B.1.351 (Beta), B.1.526 (Iota), | -Variant detection in wastewater was concordant with clinical cases.                                                                                                                                                                                                 |

|                                            |                                                        |                                                                                                                     |                                                                                                                            |                                                                                                        |                                                                                                            |                                                                                                                                                                                                                                                                |
|--------------------------------------------|--------------------------------------------------------|---------------------------------------------------------------------------------------------------------------------|----------------------------------------------------------------------------------------------------------------------------|--------------------------------------------------------------------------------------------------------|------------------------------------------------------------------------------------------------------------|----------------------------------------------------------------------------------------------------------------------------------------------------------------------------------------------------------------------------------------------------------------|
|                                            |                                                        | Authentication kit.                                                                                                 |                                                                                                                            | Illumina sequencing                                                                                    | P.1 (Gamma), P.2 (Zeta), B.1.427/9 (Epsilon), B.1.525 (Eta),                                               |                                                                                                                                                                                                                                                                |
| France, (Rios et al., 2021)                | Composite / filtration followed by ultracentrifugation | AllPrep PowerViral DNA/RNA kit (Qiagen, Hilden, Germany, #28000-50), RNeasy PowerMicrobiome kit (Qiagen, #26000-50) | <sup>a</sup> N1;                                                                                                           | Total SARS-CoV-2 N gene quantification RT-qPCR; Variant analysis: tiling PCR-based Nanopore sequencing | B.1.160, B.1.177, B.1.367, B.1.474, B.1.221, A.27, B.1.1.7 (Alpha), B.1.351 (Beta), P.1 (Gamma)            | -B.1.160 was reported as the most abundant lineage between Oct 2020 and Jan 2021.<br>-The majority of B.1.1.7 variants were found in Jan. and Feb. and subsequently declined in March.<br>-Variant detection in wastewater was concordant with clinical cases. |
| France, (Wurtz et al., 2021)               | Composite / filtration followed by ultracentrifugation | EZ1 Virus Mini kit (Qiagen, Hilden, Germany)                                                                        | <sup>a</sup> N;                                                                                                            | SARS-CoV-2 RNA quantification: RT-qPCR; Variants analysis: PCR-based direct Illumina sequencing        | B.1.1.7 (Alpha), B.1.351 (Beta), P.1 (Gamma), B.1.525 (Eta), B.1.1.138, Marseille-3, Marseille-4, 20A, 20B | -Direct sequencing is more accurate than RT-PCR in the detection of SARS-CoV-2 variants.<br>- Prevalence of the SARS-CoV-2 UK variant was higher than other variants that agreed with the clinical data.                                                       |
| France, a (S Wurtzer et al., 2022)         | Composite / filtration followed by ultracentrifugation | QIAasymphony automated extractor (QIAGEN)                                                                           | <sup>a</sup> E; <sup>b</sup> S69-70 del                                                                                    | RT-qPCR                                                                                                | B.1.1.7 (Alpha)                                                                                            | -Variant detection in wastewater was concordant with clinical cases.<br>-The rise of B.1.1.7 could be one of the reasons for the third wave in France.                                                                                                         |
| France, b (Sebastien Wurtzer et al., 2022) | Composite / filtration followed by ultracentrifugation | QIAasymphony automated extractor (QIAGEN) and some samples with extraction with lysis buffer and                    | <sup>a</sup> E; <sup>b</sup> S69-70 del, Alpha_del69-70_F186, BA.1_del69-70_F186_omicron, Delta_L452R_R22979, BA.2_F27367, | digital RT-PCR                                                                                         | B.1.617.2 (Delta) BA.1 (Omicron)                                                                           | -Variant detection in wastewater was concordant with clinical cases.<br>-The impact of vaccination could be                                                                                                                                                    |

|                                     |                                               |                                                                                                                                                                     |                                                                |                                                                                                    |                                                                 |                                                                                                                                                                                                                                                                                                                                                                                                             |
|-------------------------------------|-----------------------------------------------|---------------------------------------------------------------------------------------------------------------------------------------------------------------------|----------------------------------------------------------------|----------------------------------------------------------------------------------------------------|-----------------------------------------------------------------|-------------------------------------------------------------------------------------------------------------------------------------------------------------------------------------------------------------------------------------------------------------------------------------------------------------------------------------------------------------------------------------------------------------|
|                                     |                                               | purified with phenol/chloroform                                                                                                                                     |                                                                |                                                                                                    |                                                                 | the cause of the reduction of delta variant                                                                                                                                                                                                                                                                                                                                                                 |
| France, (Barbé et al., 2022)        | Composite / ultrafiltration                   | NucliSens kit & the NucliSens miniMAG purification system (bioMérieux, Marcy L'Etoile, France)                                                                      | WGS                                                            | WGS with ARTIC Network and a MinION Mk1C sequencer primers and protocol (Oxford Nanopore Tec., UK) | B.1.1.7 (Alpha), B.1.351 (Beta), P.1 (Gamma), B.1.617.2 (Delta) | -Detected multiple SNVs and assessed the circulation of VOC Alpha, Beta, Gamma, and Delta.                                                                                                                                                                                                                                                                                                                  |
| Netherlands, (Heijnen et al., 2021) | Composite / ultrafiltration                   | Biomerieux Nuclisens kit (Biomerieux, Amersfoort, the Netherlands) in combination with the semi-automated KingFisher mL (Thermo Scientific, Bleiswijk, Netherlands) | <sup>a</sup> N2; <sup>b</sup> S - N501Y mutation               | SARS-CoV-2 RNA quantification; RT-qPCR. N501Y mutation quantification: RT-ddPCR                    | B.1.351 (Beta)                                                  | -RT-ddPCR assay determined the proportion of lineage B.1.351 in samples with mixtures of wild type.<br>-A linear relationship between the values measured with RT-qPCR and RT-ddPCR was found.<br>-SARS-CoV-2 concentrations obtained by RT-qPCR are consistently higher (61%) than SARS-CoV-2 concentrations obtained by RT-ddPCR.<br>-Variant detection in wastewater was concordant with clinical cases. |
| Germany, (Ho et al., 2022)          | Composite / polyethylene glycol precipitation | innuPrep Virus DNA/RNA 121 kit – IPC16 (Analytik Jena GmbH)                                                                                                         | <sup>a</sup> N, E, ORF1ab, RdRP2 and RdRP1; <sup>b</sup> N501Y | RT-ddPCR                                                                                           | B.1.1.7 (Alpha)                                                 | -The detected N501Y mutations in wastewater were similar to those in the individual clinical tests.<br>-SARS-CoV-2 RNA showed its stability                                                                                                                                                                                                                                                                 |

|                                                     |                                                                            |                                                                               |                           |                                                                                                         |                                                                 |                                                                                                                                                                                                                                                                                          |
|-----------------------------------------------------|----------------------------------------------------------------------------|-------------------------------------------------------------------------------|---------------------------|---------------------------------------------------------------------------------------------------------|-----------------------------------------------------------------|------------------------------------------------------------------------------------------------------------------------------------------------------------------------------------------------------------------------------------------------------------------------------------------|
|                                                     |                                                                            |                                                                               |                           |                                                                                                         |                                                                 | under anaerobic conditions for several days.<br>-The copy numbers of SARS-CoV-2 reduced quickly in dissolved oxygen.                                                                                                                                                                     |
| Germany, (Rubio-Acero et al., 2021)                 | Grab / centrifugation                                                      | RNeasy PowerMicrobiome kit (Qiagen)                                           | <sup>a</sup> N1           | SARS-CoV-2 RNA quantification: RT-PCR and ddPCR; Variants analysis: Illumina sequencing                 | B.1.1.7 (Alpha)                                                 | -Variant detection in wastewater was concordant with clinical cases.<br>-B.1.1.7 was the dominant variant in the wastewater samples.                                                                                                                                                     |
| Germany, (Schumann et al., 2022)                    | Composite / filtration through two glass fibers followed by centrifugation | Direct-zol RNA miniprep kit (Zymo cat# R2052)                                 | <sup>b</sup> Whole genome | Illumina sequencing                                                                                     | B.1.1.7 (Alpha), B.1.617.2 (Delta), B.1.351 (Beta), P.1 (Gamma) | -A significant association between SARS-CoV-2 mutation load in wastewater and incidence rate was found.<br>- The increase of viral RNA in wastewater was shown two weeks before the increase in detected COVID-19 cases.<br>-B.1.1.7 was the dominant viral strain throughout the study. |
| Germany, (Agrawal, Orschler, Tavazzi, et al., 2022) | Composite / polyethylene glycol precipitation                              | MagMAX Microbiome Ultra Nucleic Acid isolation kit (Thermo Fisher Scientific) | Genome sequencing         | Used 237 primer pairs, resulting in 125–275 bp long amplicons, capturing nearly full SARS-CoV-2 genome. | B.1.1.529 (Omicron)                                             | -Major mutations in Omicron were reported.                                                                                                                                                                                                                                               |
| Italy, a (G. La Rosa et al., 2020)                  | NA/ polyethylene glycol precipitation                                      | MiniMAG extraction system (bioMerieux)                                        | S                         | Nested RT-PCR followed by Sanger sequencing and Nanopore sequencing                                     | B.1.1.7 (Alpha), P.1 (Gamma), B.1.525 (Eta)                     | - B.1.1.7 variant detection in wastewater was concordant with clinical cases.<br>- P.1 was absent in wastewater samples in                                                                                                                                                               |

|                                               |                                                          |                                                                                                                                            |                    |                                             |                              |                                                                                                                                                                                                                                                            |
|-----------------------------------------------|----------------------------------------------------------|--------------------------------------------------------------------------------------------------------------------------------------------|--------------------|---------------------------------------------|------------------------------|------------------------------------------------------------------------------------------------------------------------------------------------------------------------------------------------------------------------------------------------------------|
|                                               |                                                          |                                                                                                                                            |                    |                                             |                              | April, which agreed with clinical data.<br>-RT-qPCR reduces errors in RT-PCR false-negative in WWS.                                                                                                                                                        |
| Italy, b<br>(Giuseppina La Rosa et al., 2021) | Composite, grab / polyethylene glycol-dextran separation | Nu- cliSens extraction system (bioMerieux, Marcy-l'Etoile, France).                                                                        | S                  | Nested RT-PCR followed by Sanger sequencing | B.1.1.7 (Alpha), P.1 (Gamma) | -The first detection of SARS-CoV-2 B.1.1.7 variant (20I/501Y.V1) and P.1 variant (20J/501Y.V3) in wastewater were recorded.<br>-Compared with whole-genome sequencing, RT-PCR followed by Sanger sequencing can be a more sensitive and economic option.   |
| Italy,<br>(G. La Rosa et al., 2022)           | Composite/ NA                                            | N/A                                                                                                                                        | N/A                | Nested RT-PCR and Sanger Sanger Sequencing  | B.1.1.529 (Omicron)          | -Detection rate of the SARS-CoV-2 variant (Omicron) from wastewater was simultaneous with clinical samples confirmed by the real-time RT-PCR and Sanger sequencing.                                                                                        |
| Italy,<br>(Lee et al., 2022)                  | Composite / polyethylene glycol precipitation            | Scientific KingFisher Flex automated instrument (ThermoFisher Scientific) and the MagMAX CORE Nucleic Acid Purification kit (ThermoFisher) | Spike gene 493-498 | RT-qPCR (Bio-Rad CFX96)                     | B.1.1.529 (Omicron)          | -Developed an allele-specific RT-qPCR assay to simultaneously detect the stretch of mutations from Q493R to Q498R of the Omicron variant.<br>-This assay was successfully applied for WWS<br>-Variant detection in wastewater was concordant with clinical |

|                                     |                                                                                     |                                             |                                                                                                         |                                                                                                                   |                     |                                                                                                                                                                                                                                                                                       |
|-------------------------------------|-------------------------------------------------------------------------------------|---------------------------------------------|---------------------------------------------------------------------------------------------------------|-------------------------------------------------------------------------------------------------------------------|---------------------|---------------------------------------------------------------------------------------------------------------------------------------------------------------------------------------------------------------------------------------------------------------------------------------|
|                                     |                                                                                     |                                             |                                                                                                         |                                                                                                                   |                     | cases.                                                                                                                                                                                                                                                                                |
| Italy,<br>(D'Agostino et al., 2022) | Composite / polyethylene glycol (PEG) precipitation method (10% PEG and 2.25% NaCl) | SensiFAST cDNA Synthesis kit (Bioline)      | N, ORF1ab                                                                                               | qPCR & Whole Genome Sequencing                                                                                    | B.1.617.2 (Delta)   | -PCR-based rapid method was reported to be sensitive and able to determine allelic discrimination assay.<br>-Variant detection in wastewater was concordant with clinical cases.<br>SARS-CoV-2 whole-genome sequencing is used to confirm results in up to 10 viral genome positions. |
| Italy,<br>(Cutrupi et al., 2022)    | Composite / polyethylene glycol precipitation                                       | Magnetic silica beads                       | <i>orf1b</i> for SARS-CoV-2; Mutations H655Y, N679K, and P681H (ISS assay), and 8 mutations (JRC assay) | SARS-CoV-2 RNA quantification; RT-qPCR<br>Variant analysis: mutation-specific q-PCR followed by Sanger sequencing | Omicron (B.1.1.529) | -SARS-CoV-2 concentration in wastewater during the Omicron wave was 4–20 times higher than in Alpha and Delta waves.<br>-Wastewater surveillance allows an understanding of the burden of virus circulation despite a low number of clinical cases due to mass vaccination.           |
| Hungary,<br>(Róka et al., 2022)     | Composite, grab / ultrafiltration                                                   | QIAamp Viral RNA Mini kit (Qiagen, Germany) | <sup>a</sup> N1; <sup>b</sup> Spike mutations N501Y and del H69/V70                                     | SARS-CoV-2 RNA quantification; RT-qPCR, Mutation detection: RT-ddPCR                                              | B.1.1.7 (Alpha)     | -Variant detection in wastewater was concordant with clinical cases.<br>-Mutations H69/V70 and N501Y of B.1.1.7 lineage were detected in equal concentrations.                                                                                                                        |

|                                        |                                                                                     |                                                                                  |                                                   |                                                                                                                       |                                              |                                                                                                                                                                                                                          |
|----------------------------------------|-------------------------------------------------------------------------------------|----------------------------------------------------------------------------------|---------------------------------------------------|-----------------------------------------------------------------------------------------------------------------------|----------------------------------------------|--------------------------------------------------------------------------------------------------------------------------------------------------------------------------------------------------------------------------|
| Greece,<br>(Avgeris et al., 2021)      | Composite / polyethylene glycol precipitation                                       | Water DNA/RNA Magnetic Bead kit (IDEXX Laboratories Inc., Westbrook, Maine, USA) | S, ORF3a, ORF1ab/RdRP, N                          | Nested PCR/real-time PCR-based amplicon sequencing                                                                    | B.1.1.7 (Alpha)                              | -SARS-CoV-2 RNA was detected in 56.7% (17/30) of wastewater samples.<br>-Variant detection in wastewater was concordant with clinical cases.<br>-The agreement of nested PCR assay with real-time PCR results was 96.7%. |
| Greece,<br>(Galani et al., 2022)       | NA/ polyethylene glycol precipitation                                               | Magnetic-bead extraction                                                         | <sup>a</sup> N1 and N2; <sup>b</sup> Whole-genome | SARS-CoV-2 RNA quantification and stability evaluation: RT-qPCR; Variants analysis: Emulsion PCR-based NGS sequencing | B.1.1.7 (Alpha)                              | -B.1.1.7 lineage was found in 96.3%, whereas B.1.351 and P.1 were absent                                                                                                                                                 |
| Greece,<br>(Pechlivanis et al., 2022)  | Composite / centrifugation followed by filtration through electronegative membranes | Phenol–chloroform-method combined with magnetic bead binding.                    | <sup>a</sup> N2; <sup>b</sup> Whole genome        | SARS-CoV-2 RNA quantification: RT-qPCR; Variant analysis: RT-PCR based Illumina sequencing                            | B.1.1.7 (Alpha), B.1.351 (Beta),             | -A novel method called “lineagespot” was validated for detecting and quantifying differences in the mutational load of SARS-CoV-2.                                                                                       |
| Greece,<br>(Chassalevris et al., 2022) | Composite / mixed cellulose esters (MCE) membrane filter                            | Phenol–chloroform-method combined with magnetic bead binding.                    | N2, Spike Δ69-70 deletion                         | SARS-CoV-2 RNA quantification; RT-qPCR<br>Variant analysis: mutation-specific q-PCR                                   | BA.1 (Omicron)                               | -Developed an RT-qPCR assay that targets S: Δ69-70 deletion indicating Omicron BA.1.<br>-The same assay enabled the detection of Omicron in wastewater nine days before detection by clinical surveillance.              |
| Switzerland,<br>(Jahn et al., 2022)    | Composite, grab / filtration followed by concentration                              | QiaAmp Viral RNA MiniKit (Qiagen, USA)                                           | Whole genome                                      | Illumina sequencing                                                                                                   | B.1.1.7 (Alpha), B.1.351 (Beta), P.1 (Gamma) | -Several signature mutations of both B.1.1.7 and 501.V2 lineages have been                                                                                                                                               |

|                                                                                                                |                                                                                |                                                                                                |                                                      |                                                                                             |                                                                         |                                                                                                                                                                                                                                                                                                            |
|----------------------------------------------------------------------------------------------------------------|--------------------------------------------------------------------------------|------------------------------------------------------------------------------------------------|------------------------------------------------------|---------------------------------------------------------------------------------------------|-------------------------------------------------------------------------|------------------------------------------------------------------------------------------------------------------------------------------------------------------------------------------------------------------------------------------------------------------------------------------------------------|
|                                                                                                                |                                                                                |                                                                                                |                                                      |                                                                                             |                                                                         | detected in wastewater.                                                                                                                                                                                                                                                                                    |
| Switzerland,<br>(Caduff et al.,<br>2022)                                                                       | Composite<br>/ ultrafiltration                                                 | QiaAmp Viral RNA<br>MiniKit (Qiagen,<br>USA)                                                   | Spike $\Delta$ 69-70 and<br>ORF1a $\Delta$ 3675-3677 | Drop-Off RT-dPCR                                                                            | B.1.1.7 (Alpha),<br>B.1.351 (Beta),<br>P.1 (Gamma)                      | -RT-dPCR assay was<br>adapted to quantitative<br>detection of B.1.1.7,<br>P.1, and B.1.351 in<br>wastewater.<br>-The proportion of<br>1.1.7, B.1.351, and P.1<br>in wastewater increased<br>earlier than in clinical<br>samples.                                                                           |
| 54 European<br>municipalities<br>from 20<br>countries,<br>(Agrawal,<br>Orschler,<br>Schubert, et al.,<br>2022) | Composite / filtration<br>through electronegative<br>membrane; ultrafiltration | Fast RNA Blue kit<br>(MP Biomedicals),<br>Ultra Microbiome<br>kit (ThermoFisher<br>Scientific) | <sup>a</sup> N2                                      | SARS-CoV-2 RNA<br>quantification: RT-<br>qPCR; Variants<br>analysis: sequencing             | B.1.1.7 (Alpha),<br>P.1 (Gamma),<br>B.1.351 (Beta)<br>B.1.617.2 (Delta) | -Variant B.1.1.7 was<br>dominant in all<br>countries except<br>Cyprus.<br>-Variant B.1.351<br>seemed to be more<br>prevalent in Finland<br>than other countries.<br>-ORF8 mutations (i.e.<br>Q27stop, R52I) were<br>widely detected in the<br>circulated SARS-COV-<br>2 variants in the<br>sampled regions |
| Austria,<br>(Radu et al.,<br>2022)                                                                             | Composite/<br>polyethylene glycol<br>precipitation                             | Maxwell® RSC<br>AS4500 (Promega)                                                               | <sup>a</sup> N;                                      | SARS-CoV-2 RNA<br>quantification: RT-<br>qPCR; Variants<br>analysis: Illumina<br>sequencing | B.1.1.7 (Alpha)                                                         | - SARS-CoV-2 RNA<br>concentration in<br>wastewater was<br>influenced commonly<br>by the emergence of<br>Alpha lineage.<br>-The alpha variant and<br>N501Y mutation<br>percentages matched in<br>both wastewater and<br>clinical samples for the<br>same study period.                                      |

|                                         |                                                      |                                                                             |                                |                                                                                                           |                                                                                                           |                                                                                                                                                                                                                                                                                                                                                                                                                                                                              |
|-----------------------------------------|------------------------------------------------------|-----------------------------------------------------------------------------|--------------------------------|-----------------------------------------------------------------------------------------------------------|-----------------------------------------------------------------------------------------------------------|------------------------------------------------------------------------------------------------------------------------------------------------------------------------------------------------------------------------------------------------------------------------------------------------------------------------------------------------------------------------------------------------------------------------------------------------------------------------------|
| Austria,<br>(Amman et al.,<br>2022)     | Composite / polyethylene<br>glycol precipitation     | Monarch™ total<br>RNA Miniprep kit                                          | <sup>a</sup> N1                | SARS-CoV-2 RNA<br>quantification:<br>RT-qPCR; Variant<br>analysis: Illumina<br>Whole Genome<br>Sequencing | B.1.160,<br>B.1.351 (Beta),<br>B.1.1.7 (Alpha),<br>B.1.617.2 (Delta)                                      | -Reported that a robust<br>and error-tolerant<br>method was developed<br>successfully as a<br>quantitative detection<br>assay for different viral<br>variants from<br>wastewater.<br>-Alpha, Delta, and<br>Omicrons were the<br>dominant variants.<br>-Spatial variation of<br>different variants in the<br>nation was reported.<br>-Highly correlated with<br>clinical cases, even a<br>single case in a<br>catchment area was<br>captured by WWS<br>analysis of a variant. |
| Austria,<br>(Markt et al.,<br>2022)     | Composite / polyethylene<br>glycol precipitation     | Monarch total RNA<br>Miniprep kit (New<br>England Biolabs,<br>Ipswich, USA) | <sup>a</sup> N1                | SARS-CoV-2 RNA<br>quantification: RT-<br>qPCR; Variant<br>analysis: Illumina<br>sequencing                | B.1.1.7 (Alpha)                                                                                           | -Variant detection in<br>wastewater was<br>concordant with clinical<br>cases.<br>- B.1.1.7 lineage was<br>detected in wastewater<br>14 days before<br>individual testing.                                                                                                                                                                                                                                                                                                    |
| Luxembourg,<br>(Herold et al.,<br>2021) | Composite / centrifugation<br>followed by filtration | QIAamp Viral RNA<br>mini kit (Qiagen,<br>Hilden, Germany)                   | <sup>a</sup> E, RdRP, N, and S | SARS-CoV-2 RNA<br>quantification:<br>Multiplex RT-<br>qPCR; Variant<br>analysis: Illumina<br>sequencing   | B.1.1.7 (Alpha),<br>B.1.1.420, B.1.160,<br>B.1.177,<br>B.1.221,<br>B.1.258,<br>B.1.351 (Beta),<br>B.1.474 | -B.1.1.7 was the<br>dominant variant<br>during the time of the<br>study.<br>- Mutations were more<br>enriched in the S gene<br>than in other tested<br>genes in the study.<br>-Frequencies of<br>mutations found in<br>wastewater<br>corresponded to those<br>detected in the                                                                                                                                                                                                |

|                                            |                                           |                                                       |                                                                             |                                                                                                                                                                         |                                                          |                                                                                                                                                                                                  |
|--------------------------------------------|-------------------------------------------|-------------------------------------------------------|-----------------------------------------------------------------------------|-------------------------------------------------------------------------------------------------------------------------------------------------------------------------|----------------------------------------------------------|--------------------------------------------------------------------------------------------------------------------------------------------------------------------------------------------------|
|                                            |                                           |                                                       |                                                                             |                                                                                                                                                                         |                                                          | population.<br>Wastewater-based<br>variant surveillance and<br>novel SARS-CoV-2<br>variants detection                                                                                            |
| Belgium,<br>(Boogaerts et al.,<br>2022)    | Composite / centrifugal<br>filter         | Automated<br>Maxwell PureFood<br>GMO                  | <sup>a</sup> E; <sup>b</sup> SΔ69/70 deletion,<br>N501Y, SΔ241 and<br>SΔ157 | Multiplex<br>dPCR                                                                                                                                                       | B.1.1.7 (Alpha),<br>B.1.351 (Beta),<br>B.1.617.2 (Delta) | -Multiplex dPCR assay<br>was developed and<br>validated to detect<br>B.1.1.7, B.1.351, and<br>B.1.617.2 strains in<br>influent wastewater.<br>-B.1.351 strain was not<br>detected in wastewater. |
| Ireland,<br>(Reynolds et al.,<br>2022)     | Composite / centricon Plus-<br>70 filters | RNeasy<br>PowerMicrobiome<br>kit (Qiagen,<br>Germany) | N1,                                                                         | RT-qPCR/ ddPCR,<br>alpha (B.1.1.7)<br>variant, and the delta<br>(B.1.617.2) variant                                                                                     | B.1.1.7 (Alpha),<br>B.1.617.2 (Delta)                    | -Variant detection in<br>wastewater was<br>concordant with clinical<br>cases.<br>-Alpha-variant in WW<br>was detected before<br>clinical cases.                                                  |
| Denmark,<br>(Rasmussen et<br>al., 2022)    | Composite / not mentioned                 | Not mentioned                                         | Not mentioned                                                               | SARS-CoV-2 RNA<br>quantification: RT-<br>qPCR<br>Variant analysis:<br>Initial screening by<br>qPCR targeting<br>K417N mutation<br>followed by<br>Nanopore<br>sequencing | B.1.1.529 (Omicron)                                      | -Combination of<br>mutation-specific<br>qPCR and nanopore<br>sequencing for WWS<br>can identify variants<br>even at low SARS-<br>CoV-2 loads.                                                    |
| South Africa,<br>(Johnson et al.,<br>2022) | Grab / centrifugation                     | RNeasy PowerSoil<br>kit (Qiagen,<br>Germany)          | <sup>a</sup> N1 and N2; <sup>b</sup> S                                      | SARS-CoV-2 RNA<br>quantification:<br>RT-qPCR; Variants<br>analysis: genotyping<br>PCR and sequencing                                                                    | B.1.1.7 (Alpha),<br>B.1.351 (Beta),<br>B.1.617.2 (Delta) | -SARS-CoV-2 nucleic<br>acid fragments shed<br>from numerous infected<br>people were mixed in<br>wastewater.<br>-Beta variant was the<br>predominant variant<br>during the study.                 |

|                                         |                                                     |                                                                                           |                                                         |                                                                                                                                             |                                                 |                                                                                                                                                                                 |
|-----------------------------------------|-----------------------------------------------------|-------------------------------------------------------------------------------------------|---------------------------------------------------------|---------------------------------------------------------------------------------------------------------------------------------------------|-------------------------------------------------|---------------------------------------------------------------------------------------------------------------------------------------------------------------------------------|
| Brazil,<br>(Barbosa et al., 2022)       | Grab / ultracentrifugation and glycine elution      | QIAamp® Viral RNA Mini kit (Qiagen, Germany)                                              | <sup>a</sup> N1 and N2; <sup>b</sup> Whole viral genome | SARS-CoV-2 RNA quantification; RT-qPCR; Variants analysis: RT-PCR based Illumina sequencing                                                 | P.1 (Gamma)                                     | Lineage P.1 was the most prevalent variant in sewage and clinical data                                                                                                          |
| Argentina,<br>(Masachessi et al., 2022) | Grab / polyethylene glycol precipitation            | MagNA Pure 96 DNA and Viral NA Large Volume kit                                           | N and Orflab gene                                       | SARS-CoV-2 RNA quantification: RT-qPCR<br>Variant analysis: RT-qPCR targeting N501Y, E484K, delH69V70, K417T, delL242_244L, L452R and P681R | B.1.1.7 (Alpha), P.1 (Gamma), B.1.617.2 (Delta) | -WWS of SARS-CoV-2 allows tracking of variants in studied communities.                                                                                                          |
| Australia,<br>(Ahmed, et al., 2022a)    | Composite / concentrating Pipette Select            | QiaAmp Viral RNA MiniKit (Qiagen, USA)                                                    | N and S (H69-V70 del) genes                             | SARS-CoV-2 and H69-V70del quantification: RT-PCR; Variant analysis: ARTIC Network V3 scheme with Nanopore and ATOPlex amplicon sequencing   | B.1.1.529 (Omicron)                             | Detected the Omicron variant in wastewater samples collected from an aircraft.                                                                                                  |
| Nepal,<br>(Napit et al., 2021)          | Composite, grab / polyethylene glycol precipitation | Automated DNA and RNA extraction system (abGenixAIT 159 Biotech, Singapore)               | <sup>a</sup> E, N, and ORF1                             | SARS-CoV-2 RNA quantification: RT-PCR; Variants analysis: Tiled amplicon sequencing (Nanopore)                                              | B.1, B.1.36, B.1.1                              | -SARS-CoV-2 RNA was detected in 16 of 20 different sampled sites.<br>- The circulated lineages of SARS-CoV-2 in wastewater were B.1.1 (50.0%), B.1.36 (33.3%), and B.1 (16.7%). |
| Philippines,<br>(Otero et al., 2021)    | Grab / polyethylene glycol precipitation            | MagMax 175 Viral/Pathogen Nucleic Acid Isolation kit (Thermo Fisher Scientific Inc., USA) | <sup>a</sup> N, RdRP, E                                 | SARS-CoV-2 RNA detection: RT-PCR; Variants analysis: Nanopore sequencing                                                                    | B.1, B.1.1, B.6                                 | -SARS-CoV-2 RNA was detected in the wastewater samples at 91.7% (22/24).<br>- RdRP was the most abundant in samples (87.5%), followed by N                                      |

|                                  |                                           |                                                               |                                   |                                                                                                                     |                                                                      |                                                                                                                                                                                                                                                                                                                  |
|----------------------------------|-------------------------------------------|---------------------------------------------------------------|-----------------------------------|---------------------------------------------------------------------------------------------------------------------|----------------------------------------------------------------------|------------------------------------------------------------------------------------------------------------------------------------------------------------------------------------------------------------------------------------------------------------------------------------------------------------------|
|                                  |                                           |                                                               |                                   |                                                                                                                     |                                                                      | (83.3%), then E (62.5%).<br>-The RNA levels concentrated in wastewater correlated with SARS-CoV-2 RNA Ct values.                                                                                                                                                                                                 |
| Japan,<br>(Malla et al., 2022)   | Grab / modified PEG precipitation         | QiaAmp Viral RNA MiniKit (Qiagen, USA)                        | N, S, and pathogenic virus genes. | High-throughput RT-qPCR performed with the Biomark HD system (Fluidigm; currently Standard BioTools)                | B.1.1.7 (Alpha), B.1.351 (Beta), B.1.617.2 (Delta) B.1.617.1 (Kappa) | -Simultaneously detected 22 targets, including SARS-CoV-2, variants, and pathogenic viruses in a single run.<br>-Alpha and Delta variants detection in wastewater coincided with the first clinical cases.<br>-The chance of SARS-CoV-2 detection increased when multiple SARS-CoV-2 detection assays were used. |
| Israel,<br>(Yaniv et al., 2022)  | Composite / centrifugation and filtration | QiaAmp 96 Viral RNA kit (Qiagen, Germany)                     | S gene                            | One Step PrimeScript III RT-qPCR mix RR600 TAKARA, Japan) using Applied Biosystems Thermocycler (Thermo Scientific) | B.1.617.2 (Delta), B.1.1.529 (Omicron)                               | -Developed Omicron primers-probe set was highly specific and sensitive, with a LOD of 1.4 copies per $\mu$ L reaction.<br>-Noted a special pattern between the outbreak of Delta -Omicron dynamics.                                                                                                              |
| Israel,<br>(Bar-Or et al., 2022) | Composite / electronegative MCE membranes | NucliSENS easyMAG system (Biomérieux, Marcy-l'Etoile, France) | E, N, and S                       | Combination of inclusive and selective quantitative PCR assays                                                      | A19/A20 or B.1.1.7 (Alpha)                                           | -Dynamics between two variants were reported, where B.1.1.7 replaced the A19 during the study period.                                                                                                                                                                                                            |

|                                     |                                                                    |                                                                                          |                                                                                                   |                                                                                                                                                                                                                                                                                                |                                                                                                                              |                                                                                                                                                                                                                                                                                                                                |
|-------------------------------------|--------------------------------------------------------------------|------------------------------------------------------------------------------------------|---------------------------------------------------------------------------------------------------|------------------------------------------------------------------------------------------------------------------------------------------------------------------------------------------------------------------------------------------------------------------------------------------------|------------------------------------------------------------------------------------------------------------------------------|--------------------------------------------------------------------------------------------------------------------------------------------------------------------------------------------------------------------------------------------------------------------------------------------------------------------------------|
| Israel,<br>(Erster et al.,<br>2022) | Composite /<br>centrifugation, MgCl <sub>2</sub> and<br>filtration | MagNA Pure 96<br>system (Roche)<br>or the PPS<br>MagLEAD<br>system                       | E, N, S, and ORF8                                                                                 | SARS-CoV-2 RNA<br>quantification: RT-<br>qPCR.<br>Sequence variation<br>analysis: RT-PCR-<br>and nPCR-based<br>NGS Sanger<br>sequencing.                                                                                                                                                       | B.1.1.7 (Alpha) and<br>B.1.617.2 (Delta)                                                                                     | -New PCR-based<br>method is rapid and<br>cost-effective at<br>targeting different<br>mutations of SARS-<br>CoV-2.                                                                                                                                                                                                              |
| Israel,<br>(Bar-Or et al.,<br>2021) | Composite /<br>centrifugation and filtration                       | NucliSENS<br>easyMAG system<br>(bioMérieux,<br>Marcyl'Etoile,<br>France)                 | <sup>a</sup> E and RdRp; <sup>b</sup> Whole-<br>genome                                            | Multiplex RT-qPCR<br>(Bio-Rad CFX96).<br>Sanger sequencing<br>of culture-derived<br>and clinical samples.                                                                                                                                                                                      | B.1.1.7 (Alpha), and<br>B.1.617.2 (Delta),<br>P.1 (Gamma)<br>B.1.429 (Epsilon)<br>B.1.526 (Iota),<br>A.23.1<br>B.1.525 (Eta) | -WWS of SARS-CoV-<br>2 allows tracking of<br>variants in studied<br>communities.<br>-WWS worked as early<br>warning tool<br>-Wastewater detection<br>of SARS-CoV-2<br>variants was<br>concordant with<br>clinical data.                                                                                                        |
| India,<br>(Joshi et al.,<br>2022)   | Grab / polyethylene glycol<br>precipitation                        | NucleoSpin® RNA<br>Virus isolation kit<br>(Macherey-<br>Nagel GmbH & Co.<br>KG, Germany) | <sup>a</sup> E and RdRp; <sup>b</sup> Whole-<br>genome                                            | Ion AmpliSeq<br>Community SARS-<br>CoV-2 research<br>panel and Ion<br>AmpliSeq library kit<br>Plus (Invitrogen/<br>Thermo Fisher<br>Scientific) Illumina<br>sequencing.<br>SARS-CoV-2 RNA<br>quantification; RT-<br>qPCR. Variants<br>analysis: RT-PCR-<br>based direct<br>Illumina sequencing | B.1.617.2 (Delta)                                                                                                            | -35 mutations in the<br>spike protein were<br>reported across four<br>samples and were<br>categorized into 23<br>types.<br>-Spike protein<br>mutations related to the<br>B.1.617.2 lineage.<br>-B.1.617.2 appeared in<br>wastewater about a<br>month before the first<br>clinically diagnostic<br>case of the same<br>variant. |
| India,<br>(Nag et al.,<br>2022)     | Grab / centrifugation                                              | MagMAX<br>Viral/Pathogen<br>Nucleic Acid<br>Isolation kit<br>(Applied<br>Biosystems,     | <sup>a</sup> E, RdRP, N, and<br>ORF1ab; <sup>b</sup> Single<br>nucleotide<br>polymorphisms (SNPs) | SARS-CoV-2 RNA<br>quantification; RT-<br>qPCR;<br>SNPs analysis: RT-<br>PCR-based Illumina<br>sequencing                                                                                                                                                                                       | B.1,<br>B.1.617.2 (Delta)                                                                                                    | -E, N, RdRP gene<br>regions were detected<br>in all wastewater<br>influent.<br>-B.1.617.2 was most<br>frequent and detected<br>in all samples, except                                                                                                                                                                          |

|                                           |                                        |                                                       |                                                             |                                                                                             |                   |                                                                                                                                                                                                                                                                                                     |
|-------------------------------------------|----------------------------------------|-------------------------------------------------------|-------------------------------------------------------------|---------------------------------------------------------------------------------------------|-------------------|-----------------------------------------------------------------------------------------------------------------------------------------------------------------------------------------------------------------------------------------------------------------------------------------------------|
|                                           |                                        | Waltham, MA<br>USA)                                   |                                                             |                                                                                             |                   | for two samples where B.1 was detected.                                                                                                                                                                                                                                                             |
| India,<br>(Dharmadhikari<br>et al., 2022) | Grab / mixed cellulose ester<br>filter | RNeasy<br>PowerWater kit<br>(Qiagen; 14700-50-<br>NF) | <sup>a</sup> E and N; <sup>b</sup> 39 types of<br>mutations | SARS-CoV-2 RNA<br>quantification; RT-<br>qPCR; Variants<br>analysis: Nanopore<br>sequencing | B.1.617.2 (Delta) | -Five novel mutations<br>were detected in<br>variants monitored in<br>wastewater that were<br>not reported from<br>clinical sequence data<br>in India.<br>-Prevalence of B.617.2<br>percentage over wild<br>type in wastewater was<br>similar to the infection<br>cases associated with<br>B.617.2. |

## References

- Agrawal, S., Orschler, L., Schubert, S., Zachmann, K., Heijnen, L., Tavazzi, S., Gawlik, B. M., de Graaf, M., Medema, G., & Lackner, S. (2022). Prevalence and circulation patterns of SARS-CoV-2 variants in European sewage mirror clinical data of 54 European cities. *Water Research*, 214(January), 118162. <https://doi.org/10.1016/j.watres.2022.118162>
- Agrawal, S., Orschler, L., Tavazzi, S., Greither, R., Gawlik, B. M., & Lackner, S. (2022). Genome Sequencing of Wastewater Confirms the Arrival of the SARS-CoV-2 Omicron Variant at Frankfurt Airport but Limited Spread in the City of Frankfurt, Germany, in November 2021. *Microbiology Resource Announcements*, 11(2). <https://doi.org/10.1128/MRA.01229-21>
- Ahmed, W., Bivins, A., Smith, W. J. M., Metcalfe, S., Stephens, M., Jennison, A. V., Moore, F. A. J., Bourke, J., Schlebusch, S., McMahon, J., Hewitson, G., Nguyen, S., Barcelon, J., Jackson, G., Mueller, J. F., Ehret, J., Hosegood, I., Tian, W., Wang, H., ... Simpson, S. L. (2022). Detection of the Omicron (B.1.1.529) variant of SARS-CoV-2 in aircraft wastewater. *Science of The Total Environment*, 820, 153171. <https://doi.org/10.1016/j.scitotenv.2022.153171>
- Ai, Y., Davis, A., Jones, D., Lemeshow, S., Tu, H., He, F., Ru, P., Pan, X., Bohrerova, Z., & Lee, J. (2021). Wastewater SARS-CoV-2 monitoring as a community-level COVID-19 trend tracker and variants in Ohio, United States. *Science of The Total Environment*, 801, 149757. <https://doi.org/10.1016/j.scitotenv.2021.149757>

- Amman, F., Markt, R., Endler, L., Hupfau, S., Agerer, B., Schedl, A., Richter, L., Zechmeister, M., Bicher, M., Heiler, G., Triska, P., Thornton, M., Penz, T., Senekowitsch, M., Laine, J., Keszei, Z., Klimek, P., Nägele, F., Mayr, M., ... Bergthaler, A. (2022). Viral variant-resolved wastewater surveillance of SARS-CoV-2 at national scale. *Nature Biotechnology*, 40(12), 1814–1822. <https://doi.org/10.1038/s41587-022-01387-y>
- Ash, K. T., Alamilla, I., Li, Y., Joyner, D. C., Williams, D. E., McKay, P. J., Green, B. M., Iler, C., DeBlander, S. E., Kara-Murdoch, F., Swift, C. M., & Hazen, T. C. (2021). Coding-Complete Genome Sequence of a SARS-CoV-2 Variant Obtained from Raw Sewage at the University of Tennessee—Knoxville Campus. *Microbiology Resource Announcements*, 10(47), 1–3. <https://doi.org/10.1128/MRA.01049-21>
- Avgeris, M., Adamopoulos, P. G., Galani, A., Xagorari, M., Gourgiotis, D., Trougakos, I. P., Voulgaris, N., Dimopoulos, M.-A., Thomaidis, N. S., & Scorilas, A. (2021). Novel Nested-Seq Approach for SARS-CoV-2 Real-Time Epidemiology and In-Depth Mutational Profiling in Wastewater. *International Journal of Molecular Sciences*, 22(16), 8498. <https://doi.org/10.3390/ijms22168498>
- Bar-Or, I., Indenbaum, V., Weil, M., Elul, M., Levi, N., Aguvaev, I., Cohen, Z., Levy, V., Azar, R., Mannasse, B., Shirazi, R., Bucris, E., Mor, O., Sela Brown, A., Sofer, D., Zuckerman, N. S., Mendelson, E., & Erster, O. (2022). National Scale Real-Time Surveillance of SARS-CoV-2 Variants Dynamics by Wastewater Monitoring in Israel. *Viruses*, 14(6), 1229. <https://doi.org/10.3390/v14061229>
- Bar-Or, I., Weil, M., Indenbaum, V., Bucris, E., Bar-Ilan, D., Elul, M., Levi, N., Aguvaev, I., Cohen, Z., Shirazi, R., Erster, O., Sela-Brown, A., Sofer, D., Mor, O., Mendelson, E., & Zuckerman, N. S. (2021). Detection of SARS-CoV-2 variants by genomic analysis of wastewater samples in Israel. *Science of The Total Environment*, 789, 148002. <https://doi.org/10.1016/j.scitotenv.2021.148002>
- Barbé, L., Schaeffer, J., Besnard, A., Jousse, S., Wurtzer, S., Moulin, L., Le Guyader, F. S., & Desdouts, M. (2022). SARS-CoV-2 Whole-Genome Sequencing Using Oxford Nanopore Technology for Variant Monitoring in Wastewaters. *Frontiers in Microbiology*, 13. <https://doi.org/10.3389/fmicb.2022.889811>
- Barbosa, M. R. F., Garcia, S. C., Bruni, A. de C., Machado, F. S., de Oliveira, R. X., Dropa, M., da Costa, A. C., Leal, E., Brandão, C. J., da Silva, R. L. O., Iko, B. Y., Kondo, V. K. M., de Araújo, R. S., da Silveira, V. B., de Andrade, T. M., Nunes, D. R., Janini, L. M. R., Braconi, C. T., Maricato, J. T., & Sato, M. I. Z. (2022). One-year surveillance of SARS-CoV-2 in wastewater from vulnerable urban communities in metropolitan São Paulo, Brazil. *Journal of Water and Health*, 20(2), 471–490. <https://doi.org/10.2166/wh.2022.210>
- Boehm, A. B., Hughes, B., Wolfe, M. K., White, B. J., Duong, D., & Chan-Herur, V. (2022). Regional Replacement of SARS-CoV-2 Variant Omicron BA.1 with BA.2 as Observed through Wastewater Surveillance. *Environmental Science & Technology Letters*, 9(6), 575–580. <https://doi.org/10.1021/acs.estlett.2c00266>
- Boogaerts, T., Van den Bogaert, S., Van Poelvoorde, L. A. E., El Masri, D., De Roeck, N., Roosens, N. H. C., Lesenfans, M., Lahousse, L., Van Hoorde, K., van Nuijs, A. L. N., & Delputte, P. (2022). Optimization and Application of a Multiplex Digital PCR Assay for the Detection of SARS-CoV-2 Variants of Concern in Belgian Influent Wastewater. *Viruses*, 14(3), 610. <https://doi.org/10.3390/v14030610>
- Brumfield, K. D., Leddy, M., Usmani, M., Cotruvo, J. A., Tien, C.-T., Dorsey, S., Graubics, K., Fanelli, B., Zhou, I., Registe, N., Dadlani, M., Wimalarante, M., Jinasena, D., Abayagunawardena, R., Withanachchi, C., Huq, A., Jutla, A., & Colwell, R. R. (2022). Microbiome Analysis for Wastewater Surveillance during COVID-19. *MBio*, 13(4). <https://doi.org/10.1128/mbio.00591-22>

- Caduff, L., Dreifuss, D., Schindler, T., Devaux, A. J., Ganesanandamoorthy, P., Kull, A., Stachler, E., Fernandez-Cassi, X., Beerenwinkel, N., Kohn, T., Ort, C., & Julian, T. R. (2022). Inferring transmission fitness advantage of SARS-CoV-2 variants of concern from wastewater samples using digital PCR, Switzerland, December 2020 through March 2021. *Eurosurveillance*, 27(10), 1–10. <https://doi.org/10.2807/1560-7917.ES.2022.27.10.2100806>
- Carcereny, A., Garcia-Pedemonte, D., Martínez-Velázquez, A., Quer, J., Garcia-Cehic, D., Gregori, J., Antón, A., Andrés, C., Pumarola, T., Chacón-Villanueva, C., Borrego, C. M., Bosch, A., Guix, S., & Pintó, R. M. (2022). Dynamics of SARS-CoV-2 Alpha (B.1.1.7) variant spread: The wastewater surveillance approach. *Environmental Research*, 208(January), 112720. <https://doi.org/10.1016/j.envres.2022.112720>
- Carcereny, A., Martínez-Velázquez, A., Bosch, A., Allende, A., Truchado, P., Cascales, J., Romalde, J. L., Lois, M., Polo, D., Sánchez, G., Pérez-Cataluña, A., Díaz-Reolid, A., Antón, A., Gregori, J., Garcia-Cehic, D., Quer, J., Palau, M., Ruano, C. G., Pintó, R. M., & Guix, S. (2021). Monitoring Emergence of the SARS-CoV-2 B.1.1.7 Variant through the Spanish National SARS-CoV-2 Wastewater Surveillance System (VATar COVID-19). *Environmental Science & Technology*, 55(17), 11756–11766. <https://doi.org/10.1021/acs.est.1c03589>
- Chassalevris, T., Chaintoutis, S. C., Koureas, M., Petala, M., Moutou, E., Beta, C., Kyritsi, M., Hadjichristodoulou, C., Kostoglou, M., Karapantsios, T., Papadopoulos, A., Papaioannou, N., & Dovas, C. I. (2022). SARS-CoV-2 wastewater monitoring using a novel PCR-based method rapidly captured the Delta-to-Omicron BA.1 transition patterns in the absence of conventional surveillance evidence. *Science of The Total Environment*, 844, 156932. <https://doi.org/10.1016/j.scitotenv.2022.156932>
- Corchis-Scott, R., Geng, Q., Seth, R., Ray, R., Beg, M., Biswas, N., Charron, L., Drouillard, K. D., D'Souza, R., Heath, D. D., Houser, C., Lawal, F., McGinlay, J., Menard, S. L., Porter, L. A., Rawlings, D., Scholl, M. L., Siu, K. W. M., Tong, Y., ... McKay, R. M. L. (2021). Averting an Outbreak of SARS-CoV-2 in a University Residence Hall through Wastewater Surveillance. *Microbiology Spectrum*, 9(2). <https://doi.org/10.1128/Spectrum.00792-21>
- Crits-Christoph, A., Kantor, R. S., Olm, M. R., Whitney, O. N., Al-Shayeb, B., Lou, Y. C., Flamholz, A., Kennedy, L. C., Greenwald, H., Hinkle, A., Hetzel, J., Spitzer, S., Koble, J., Tan, A., Hyde, F., Schroth, G., Kuersten, S., Banfield, J. F., & Nelson, K. L. (2021). Genome Sequencing of Sewage Detects Regionally Prevalent SARS-CoV-2 Variants. *MBio*, 12(1). <https://doi.org/10.1128/mBio.02703-20>
- Cutrupi, F., Cadonna, M., Manara, S., Postinghel, M., La Rosa, G., Suffredini, E., & Foladori, P. (2022). The wave of the SARS-CoV-2 Omicron variant resulted in a rapid spike and decline as highlighted by municipal wastewater surveillance. *Environmental Technology & Innovation*, 28, 102667. <https://doi.org/10.1016/j.eti.2022.102667>
- D'Agostino, Y., Rocco, T., Ferravante, C., Porta, A., Tosco, A., Cappa, V. M., Lamberti, J., Alexandrova, E., Memoli, D., Terenzi, I., Pironti, C., Motta, O., Weisz, A., Giurato, G., & Rizzo, F. (2022). Rapid and sensitive detection of SARS-CoV-2 variants in nasopharyngeal swabs and wastewaters. *Diagnostic Microbiology and Infectious Disease*, 102(4), 115632. <https://doi.org/10.1016/j.diagmicrobio.2021.115632>
- Dharmadhikari, T., Rajput, V., Yadav, R., Boargaonkar, R., Patil, D., Kale, S., Kamble, S. P., Dastager, S. G., & Dharne, M. S. (2022). High throughput sequencing based direct detection of SARS-CoV-2 fragments in wastewater of Pune, West India. *Science of The Total Environment*, 807, 151038. <https://doi.org/10.1016/j.scitotenv.2021.151038>
- Erster, O., Mendelson, E., Kabat, A., Levy, V., Mannasse, B., Assraf, H., Azar, R., Ali, Y., Bucris, E., Bar-Ilan, D., Mor, O., Elul, M., Mandelboim, M., Sofer, D.,

- Fleishon, S., Zuckerman, N. S., & Bar-Or, I. (2022). Specific Detection of SARS-CoV-2 Variants B.1.1.7 (Alpha) and B.1.617.2 (Delta) Using a One-Step Quantitative PCR Assay. *Microbiology Spectrum*, 10(2). <https://doi.org/10.1128/spectrum.02176-21>
- Galani, A., Aalizadeh, R., Kostakis, M., Markou, A., Alygizakis, N., Lytras, T., Adamopoulos, P. G., Peccia, J., Thompson, D. C., Kontou, A., Karagiannidis, A., Lianidou, E. S., Avgeris, M., Paraskevis, D., Tsiodras, S., Scorilas, A., Vasiliou, V., Dimopoulos, M. A., & Thomaidis, N. S. (2022). SARS-CoV-2 wastewater surveillance data can predict hospitalizations and ICU admissions. *Science of the Total Environment*, 804, 150151. <https://doi.org/10.1016/j.scitotenv.2021.150151>
- Graber, T. E., Mercier, É., Bhatnagar, K., Fuzzen, M., D'Aoust, P. M., Hoang, H.-D., Tian, X., Towhid, S. T., Plaza-Diaz, J., Eid, W., Alain, T., Butler, A., Goodridge, L., Servos, M., & Delatolla, R. (2021). Near real-time determination of B.1.1.7 in proportion to total SARS-CoV-2 viral load in wastewater using an allele-specific primer extension PCR strategy. *Water Research*, 205, 117681. <https://doi.org/10.1016/j.watres.2021.117681>
- Gregory, D. A., Wieberg, C. G., Wenzel, J., Lin, C.-H., & Johnson, M. C. (2021). Monitoring SARS-CoV-2 Populations in Wastewater by Amplicon Sequencing and Using the Novel Program SAM Refiner. *Viruses*, 13(8), 1647. <https://doi.org/10.3390/v13081647>
- Heijnen, L., Elsinga, G., de Graaf, M., Molenkamp, R., Koopmans, M. P. G., & Medema, G. (2021). Droplet digital RT-PCR to detect SARS-CoV-2 signature mutations of variants of concern in wastewater. *Science of The Total Environment*, 799(January), 149456. <https://doi.org/10.1016/j.scitotenv.2021.149456>
- Herold, M., D'Hérouël, A. F., May, P., Delogu, F., Wienecke-Baldacchino, A., Tapp, J., Walczak, C., Wilmes, P., Cauchie, H.-M., Fournier, G., & Ogorzaly, L. (2021). Genome Sequencing of SARS-CoV-2 Allows Monitoring of Variants of Concern through Wastewater. *Water*, 13(21), 3018. <https://doi.org/10.3390/w13213018>
- Ho, J., Stange, C., Suhrborg, R., Wurzbacher, C., Drewes, J. E., & Tiehm, A. (2022). SARS-CoV-2 wastewater surveillance in Germany: Long-term RT-digital droplet PCR monitoring, suitability of primer/probe combinations and biomarker stability. *Water Research*, 210, 117977. <https://doi.org/10.1016/j.watres.2021.117977>
- Hubert, C. R. J., Acosta, N., Waddell, B. J. M., Hasing, M. E., Qiu, Y., Fuzzen, M., Harper, N. B. J., Bautista, M. A., Gao, T., Papparis, C., Van Doorn, J., Du, K., Xiang, K., Chan, L., Vivas, L., Pradhan, P., McCaig, J., Low, K., England, W. E., ... Lee, B. E. (2022). Tracking Emergence and Spread of SARS-CoV-2 Omicron Variant in Large and Small Communities by Wastewater Monitoring in Alberta, Canada. *Emerging Infectious Diseases*, 28(9), 1770–1776. <https://doi.org/10.3201/eid2809.220476>
- Jahn, K., Dreifuss, D., Topolsky, I., Kull, A., Ganesanandamoorthy, P., Fernandez-Cassi, X., Bänziger, C., Devaux, A. J., Stachler, E., Caduff, L., Cariti, F., Corzón, A. T., Fuhrmann, L., Chen, C., Jablonski, K. P., Nadeau, S., Feldkamp, M., Beisel, C., Aquino, C., ... Beerenwinkel, N. (2022). Early detection and surveillance of SARS-CoV-2 genomic variants in wastewater using COJAC. *Nature Microbiology*, 7(8), 1151–1160. <https://doi.org/10.1038/s41564-022-01185-x>
- Johnson, R., Sharma, J. R., Ramharack, P., Mangwana, N., Kinnear, C., Viraragavan, A., Glanzmann, B., Louw, J., Abdelatif, N., Reddy, T., Surujlal-Naicker, S., Nkambule, S., Mahlangeni, N., Webster, C., Mdhululi, M., Gray, G., Mathee, A., Preiser, W., Muller, C., & Street, R. (2022). Tracking the circulating SARS-

CoV-2 variant of concern in South Africa using wastewater-based epidemiology. *Scientific Reports*, 12(1), 1182. <https://doi.org/10.1038/s41598-022-05110-4>

Joshi, M., Kumar, M., Srivastava, V., Kumar, D., Rathore, D. S., Pandit, R., Graham, D. W., & Joshi, C. G. (2022). Genetic sequencing detected the SARS-CoV-2 delta variant in wastewater a month prior to the first COVID-19 case in Ahmedabad (India). *Environmental Pollution*, 310, 119757. <https://doi.org/10.1016/j.envpol.2022.119757>

La Rosa, G., Iaconelli, M., Veneri, C., Mancini, P., Bonanno Ferraro, G., Brandtner, D., Lucentini, L., Bonadonna, L., Rossi, M., Grigioni, M., & Suffredini, E. (2022). The rapid spread of SARS-CoV-2 Omicron variant in Italy reflected early through wastewater surveillance. *Science of The Total Environment*, 837, 155767. <https://doi.org/10.1016/j.scitotenv.2022.155767>

La Rosa, G., Mancini, P., Bonanno Ferraro, G., Veneri, C., Iaconelli, M., Lucentini, L., Bonadonna, L., Brusafferro, S., Brandtner, D., Fasanella, A., Pace, L., Parisi, A., Galante, D., Suffredini, E., Rosa, G. La, Mancini, P., Ferraro, G. B., Veneri, C., Iaconelli, M., & Lucentini, L. (2020). Rapid screening for SARS-CoV-2 variants of concern in clinical and environmental samples using nested RT-PCR assays targeting key mutations of the spike protein. *Water Research*, 197(117104), 117104. <https://doi.org/10.1016/j.watres.2021.117104>

La Rosa, Giuseppina, Brandtner, D., Mancini, P., Veneri, C., Ferraro, G. B., Bonadonna, L., Lucentini, L., & Suffredini, E. (2021). Key sars-cov-2 mutations of alpha, gamma, and eta variants detected in urban wastewaters in Italy by long-read amplicon sequencing based on nanopore technology. *Water*, 13(18). <https://doi.org/10.3390/w13182503>

Lawal, O. U., Zhang, L., Parreira, V. R., Brown, R. S., Chettleburgh, C., Dannah, N., Delatolla, R., Gilbride, K. A., Graber, T. E., Islam, G., Knockleby, J., Ma, S., McDougall, H., McKay, R. M., Mloszewski, A., Oswald, C., Servos, M., Swinwood-Sky, M., Ybazeta, G., ... Goodridge, L. (2022). Metagenomics of Wastewater Influent from Wastewater Treatment Facilities across Ontario in the Era of Emerging SARS-CoV-2 Variants of Concern. *Microbiology Resource Announcements*, 11(7). <https://doi.org/10.1128/mra.00362-22>

Layton, B. A., Kaya, D., Kelly, C., Williamson, K. J., Alegre, D., Bachhuber, S. M., Banwarth, P. G., Bethel, J. W., Carter, K., Dalziel, B. D., Dasenko, M., Geniza, M., George, A., Girard, A.-M., Haggerty, R., Higley, K. A., Hynes, D. M., Lubchenko, J., McLaughlin, K. R., ... Radniecki, T. S. (2022). Evaluation of a Wastewater-Based Epidemiological Approach to Estimate the Prevalence of SARS-CoV-2 Infections and the Detection of Viral Variants in Disparate Oregon Communities at City and Neighborhood Scales. *Environmental Health Perspectives*, 130(6). <https://doi.org/10.1289/EHP10289>

Lee, W. L., Armas, F., Guarneri, F., Gu, X., Formenti, N., Wu, F., Chandra, F., Parisio, G., Chen, H., Xiao, A., Romeo, C., Scali, F., Tonni, M., Leifels, M., Chua, F. J. D., Kwok, G. W., Tay, J. Y., Pasquali, P., Thompson, J., ... Alm, E. J. (2022). Rapid displacement of SARS-CoV-2 variant Delta by Omicron revealed by allele-specific PCR in wastewater. *Water Research*, 221, 118809. <https://doi.org/10.1016/j.watres.2022.118809>

Lee, W. L., Imakaev, M., Armas, F., McElroy, K. A., Gu, X., Duvallet, C., Chandra, F., Chen, H., Leifels, M., Mendola, S., Floyd-O'Sullivan, R., Powell, M. M., Wilson, S. T., Berge, K. L. J., Lim, C. Y. J., Wu, F., Xiao, A., Moniz, K., Ghaeli, N., ... Alm, E. J. (2021). Quantitative SARS-CoV-2 Alpha Variant B.1.1.7 Tracking in Wastewater by Allele-Specific RT-qPCR. *Environmental Science & Technology Letters*, 8(8), 675–682. <https://doi.org/10.1021/acs.estlett.1c00375>

- Li, L., Uppal, T., Hartley, P., Gorzalski, A., Pandori, M., Picker, M. A., Verma, S., & Pagilla, K. (2021). Detecting Sars-Cov-2 Variants in Wastewater and Their Correlation with Circulating Variants in the Communities. *SSRN Electronic Journal*. <https://doi.org/10.2139/ssrn.3974367>
- Lin, X., Glier, M., Kuchinski, K., Ross-Van Mierlo, T., McVea, D., Tyson, J. R., Prystajec, N., & Ziels, R. M. (2021). Assessing Multiplex Tiling PCR Sequencing Approaches for Detecting Genomic Variants of SARS-CoV-2 in Municipal Wastewater. *MSystems*, 6(5), 1–7. <https://doi.org/10.1128/mSystems.01068-21>
- Malla, B., Thakali, O., Shrestha, S., Segawa, T., Kitajima, M., & Haramoto, E. (2022). Application of a high-throughput quantitative PCR system for simultaneous monitoring of SARS-CoV-2 variants and other pathogenic viruses in wastewater. *Science of The Total Environment*, 853, 158659. <https://doi.org/10.1016/j.scitotenv.2022.158659>
- Markt, R., Endler, L., Amman, F., Schedl, A., Penz, T., Büchel-Marxer, M., Grünbacher, D., Mayr, M., Peer, E., Pedrazzini, M., Rauch, W., Wagner, A. O., Allerberger, F., Berghaler, A., & Insam, H. (2022). Detection and abundance of SARS-CoV-2 in wastewater in Liechtenstein, and the estimation of prevalence and impact of the B.1.1.7 variant. *Journal of Water and Health*, 20(1), 114–125. <https://doi.org/10.2166/wh.2021.180>
- Martin, J., Klapsa, D., Wilton, T., Zambon, M., Bentley, E., Bujaki, E., Fritzsche, M., Mate, R., & Majumdar, M. (2020). Tracking SARS-CoV-2 in Sewage: Evidence of Changes in Virus Variant Predominance during COVID-19 Pandemic. *Viruses*, 12(10), 1144. <https://doi.org/10.3390/v12101144>
- Masachessi, G., Castro, G., Cachi, A. M., Marinzalda, M. de los Á., Liendo, M., Pisano, M. B., Sicilia, P., Ibarra, G., Rojas, R. M., López, L., Barbás, G., Cardozo, D., Ré, V. E., & Nates, S. V. (2022). Wastewater based epidemiology as a silent sentinel of the trend of SARS-CoV-2 circulation in the community in central Argentina. *Water Research*, 219, 118541. <https://doi.org/10.1016/j.watres.2022.118541>
- Mishra, S., Mindermann, S., Sharma, M., Whittaker, C., Mellan, T. A., Wilton, T., Klapsa, D., Mate, R., Fritzsche, M., Zambon, M., Ahuja, J., Howes, A., Miscouridou, X., Nason, G. P., Ratmann, O., Semenova, E., Leech, G., Sandkühler, J. F., Rogers-Smith, C., ... Flaxman, S. (2021). Changing composition of SARS-CoV-2 lineages and rise of Delta variant in England. *EClinicalMedicine*, 39, 101064. <https://doi.org/10.1016/j.eclinm.2021.101064>
- Nag, A., Arora, S., Sinha, V., Meena, E., Sutaria, D., Gupta, A. B., & Medicherla, K. M. (2022). Monitoring of SARS-CoV-2 Variants by Wastewater-Based Surveillance as a Sustainable and Pragmatic Approach—A Case Study of Jaipur (India). *Water*, 14(3), 297. <https://doi.org/10.3390/w14030297>
- Napit, R., Manandhar, P., Chaudhary, A., Shrestha, B., Poudel, A., Raut, R., Pradhan, S., Raut, S., Mathema, S., Rajbhandari, R., Dixit, S., Schwind, J. S., Johnson, C. K., Mazet, J. K., & Karmacharya, D. (2021). Rapid genomic surveillance of SARS-CoV-2 in a dense urban community using environmental (sewage) samples. *MedRxiv*, 2021.03.29.21254053. <https://doi.org/https://doi.org/10.1101/2021.03.29.21254053>
- Novoa, B., Ríos-Castro, R., Otero-Muras, I., Gouveia, S., Cabo, A., Saco, A., Rey-Campos, M., Pájaro, M., Fajar, N., Aranguren, R., Romero, A., Panebianco, A., Valdés, L., Payo, P., Alonso, A. A., Figueras, A., & Cameselle, C. (2022). Wastewater and marine bioindicators surveillance to anticipate COVID-19 prevalence and to explore SARS-CoV-2 diversity by next generation sequencing: One-year study. *Science of The Total Environment*, 833, 155140. <https://doi.org/10.1016/j.scitotenv.2022.155140>
- Oh, C., Sashittal, P., Zhou, A., Wang, L., El-Kebir, M., & Nguyen, T. H. (2022). Design of SARS-CoV-2 Variant-Specific PCR Assays Considering Regional and

Temporal Characteristics. *Applied and Environmental Microbiology*, 88(7). <https://doi.org/10.1128/aem.02289-21>

- Oloye, F. F., Xie, Y., Asadi, M., Cantin, J., Challis, J. K., Brinkmann, M., McPhedran, K. N., Kristian, K., Keller, M., Sadowski, M., Jones, P. D., Landgraff, C., Mangat, C., Fuzzen, M., Servos, M. R., & Giesy, J. P. (2022). Rapid transition between SARS-CoV-2 variants of concern Delta and Omicron detected by monitoring municipal wastewater from three Canadian cities. *Science of The Total Environment*, 841, 156741. <https://doi.org/10.1016/j.scitotenv.2022.156741>
- Otero, M. C. B., Murao, L. A. E., Limen, M. A. G., Gaite, P. L. A., Bacus, M. G., Acaso, J. T., Corazo, K., Knot, I. E., Sajonia, H., Reyes, F. L. de los, Jaraula, C. M. B., Baja, E. S., & Mundo, D. M. N. Del. (2021). Wastewater-Based Epidemiology and Whole-Genome Sequencing for Community-Level Surveillance of SARS-CoV-2 in Selected Urban Communities of Davao City, Philippines: A Pilot Study. *MedRxiv*, 2021.08.27.21262450. <https://doi.org/https://doi.org/10.1101/2021.08.27.21262450>
- Pechlivanis, N., Tsagiopoulou, M., Maniou, M. C., Togkousidis, A., Mouchtaropoulou, E., Chassalevris, T., Chaintoutis, S. C., Petala, M., Kostoglou, M., Karapantsios, T., Laidou, S., Vlachonikola, E., Chatzidimitriou, A., Papadopoulos, A., Papaioannou, N., Dovas, C. I., Argiriou, A., & Psomopoulos, F. (2022). Detecting SARS-CoV-2 lineages and mutational load in municipal wastewater and a use-case in the metropolitan area of Thessaloniki, Greece. *Scientific Reports*, 12(1), 2659. <https://doi.org/10.1038/s41598-022-06625-6>
- Peng, J., Sun, J., Yang, M. I., Gibson, R. M., Arts, E. J., Olabode, A. S., Poon, A. F. Y., Wang, X., Wheeler, A. R., Edwards, E. A., & Peng, H. (2022). Early Warning Measurement of SARS-CoV-2 Variants of Concern in Wastewaters by Mass Spectrometry. *Environmental Science & Technology Letters*, 9(7), 638–644. <https://doi.org/10.1021/acs.estlett.2c00280>
- Pérez-Cataluña, A., Chiner-Oms, Á., Cuevas-Ferrando, E., Díaz-Reolid, A., Falcó, I., Randazzo, W., Girón-Guzmán, I., Allende, A., Bracho, M. A., Comas, I., & Sánchez, G. (2022). Spatial and temporal distribution of SARS-CoV-2 diversity circulating in wastewater. *Water Research*, 211(January), 118007. <https://doi.org/10.1016/j.watres.2021.118007>
- Peterson, S. W., Lidder, R., Daigle, J., Wonitowy, Q., Dueck, C., Nagasawa, A., Mulvey, M. R., & Mangat, C. S. (2022). RT-qPCR detection of SARS-CoV-2 mutations S 69–70 del, S N501Y and N D3L associated with variants of concern in Canadian wastewater samples. *Science of The Total Environment*, 810, 151283. <https://doi.org/10.1016/j.scitotenv.2021.151283>
- Radu, E., Masseron, A., Amman, F., Schedl, A., Agerer, B., Endler, L., Penz, T., Bock, C., Bergthaler, A., Vierheilig, J., Hufnagl, P., Korschineck, I., Krampe, J., & Kreuzinger, N. (2022). Emergence of SARS-CoV-2 Alpha lineage and its correlation with quantitative wastewater-based epidemiology data. *Water Research*, 215(February), 118257. <https://doi.org/10.1016/j.watres.2022.118257>
- Rainey, A. L., Loeb, J. C., Robinson, S. E., Lednický, J. A., McPherson, J., Colson, S., Allen, M., Coker, E. S., Sabo-Attwood, T., Maurelli, A. T., & Bisesi, J. H. (2022). Wastewater surveillance for SARS-CoV-2 in a small coastal community: Effects of tourism on viral presence and variant identification among low prevalence populations. *Environmental Research*, 208, 112496. <https://doi.org/10.1016/j.envres.2021.112496>
- Rasmussen, L. D., Richter, S. R., Midgley, S. E., & Franck, K. T. (2022). Detecting SARS-CoV-2 Omicron B.1.1.529 Variant in Wastewater Samples by Using Nanopore Sequencing. *Emerging Infectious Diseases*, 28(6). <https://doi.org/10.3201/eid2806.220194>

- Reynolds, L. J., Gonzalez, G., Sala-Comorera, L., Martin, N. A., Byrne, A., Fennema, S., Holohan, N., Kuntamukkula, S. R., Sarwar, N., Nolan, T. M., Stephens, J. H., Whitty, M., Bennett, C., Luu, Q., Morley, U., Yandle, Z., Dean, J., Joyce, E., O'Sullivan, J. J., ... Meijer, W. G. (2022). SARS-CoV-2 variant trends in Ireland: Wastewater-based epidemiology and clinical surveillance. *Science of The Total Environment*, 838, 155828. <https://doi.org/10.1016/j.scitotenv.2022.155828>
- Rios, G., Lacoux, C., Leclercq, V., Diamant, A., Lebrigand, K., Lazuka, A., Soyeux, E., Lacroix, S., Fassy, J., Couesnon, A., Thiery, R., Mari, B., Pradier, C., Waldmann, R., & Barbry, P. (2021). Monitoring SARS-CoV-2 variants alterations in Nice neighborhoods by wastewater nanopore sequencing. *The Lancet Regional Health - Europe*, 10, 100202. <https://doi.org/10.1016/j.lanepe.2021.100202>
- Róka, E., Déri, D., Khayer, B., Kis, Z., Schuler, E., Magyar, N., Pályi, B., Pándics, T., & Vargha, M. (2022). SARS-CoV-2 variant detection from wastewater: rapid spread of B.1.1.7 lineage in Hungary. *Journal of Water and Health*, 20(2), 277–286. <https://doi.org/10.2166/wh.2022.179>
- Rothman, J. A., Loveless, T. B., Kapcia, J., Adams, E. D., Steele, J. A., Zimmer-Faust, A. G., Langlois, K., Wanless, D., Griffith, M., Mao, L., Chokry, J., Griffith, J. F., & Whiteson, K. L. (2021). RNA Viromics of Southern California Wastewater and Detection of SARS-CoV-2 Single-Nucleotide Variants. *Applied and Environmental Microbiology*, 87(23), 1–15. <https://doi.org/10.1128/AEM.01448-21>
- Rubio-Acero, R., Beyerl, J., Muenchhoff, M., Roth, M. S., Castelletti, N., Paunovic, I., Radon, K., Springer, B., Nagel, C., Boehm, B., Böhmer, M. M., Graf, A., Blum, H., Krebs, S., Keppler, O. T., Osterman, A., Khan, Z. N., Hoelscher, M., Wieser, A., ... Thorbjörn, Z. (2021). Spatially resolved qualified sewage spot sampling to track SARS-CoV-2 dynamics in Munich - One year of experience. *Science of The Total Environment*, 797(January), 149031. <https://doi.org/10.1016/j.scitotenv.2021.149031>
- Schumann, V.-F., de Castro Cuadrat, R. R., Wyler, E., Wurmus, R., Deter, A., Quedenau, C., Dohmen, J., Fixel, M., Borodina, T., Blume, A., Freimuth, J., Meixner, M., Grau, J. H., Liere, K., Hackenbeck, T., Zietzschmann, F., Gnirss, R., Böckelmann, U., Uyar, B., ... Akalin, A. (2022). SARS-CoV-2 infection dynamics revealed by wastewater sequencing analysis and deconvolution. *Science of The Total Environment*, 853, 158931. <https://doi.org/10.1016/j.scitotenv.2022.158931>
- Silva, C. S., Tryndyak, V. P., Camacho, L., Orloff, M. S., Porter, A., Garner, K., Mullis, L., & Azevedo, M. (2022). Temporal dynamics of SARS-CoV-2 genome and detection of variants of concern in wastewater influent from two metropolitan areas in Arkansas. *Science of The Total Environment*, 849, 157546. <https://doi.org/10.1016/j.scitotenv.2022.157546>
- Smyth, D. S., Trujillo, M., Gregory, D. A., Cheung, K., Gao, A., Graham, M., Guan, Y., Guldenpfennig, C., Hoxie, I., Kannoly, S., Kubota, N., Lyddon, T. D., Markman, M., Rushford, C., San, K. M., Sompanya, G., Spagnolo, F., Suarez, R., Teixeira, E., ... Dennehy, J. J. (2022). Tracking cryptic SARS-CoV-2 lineages detected in NYC wastewater. *Nature Communications*, 13(1), 635. <https://doi.org/10.1038/s41467-022-28246-3>
- Sutton, M., Radniecki, T. S., Kaya, D., Alegre, D., Geniza, M., Girard, A.-M., Carter, K., Dasenko, M., Sanders, J. L., Cieslak, P. R., Kelly, C., & Tyler, B. M. (2022). Detection of SARS-CoV-2 B.1.351 (Beta) Variant through Wastewater Surveillance before Case Detection in a Community, Oregon, USA. *Emerging Infectious Diseases*, 28(6). <https://doi.org/10.3201/eid2806.211821>
- Swift, C. L., Isanovic, M., Correa Velez, K. E., & Norman, R. S. (2021). Community-level SARS-CoV-2 sequence diversity revealed by wastewater sampling.

- Science of The Total Environment*, 801(January), 149691. <https://doi.org/10.1016/j.scitotenv.2021.149691>
- Vo, V., Tillett, R. L., Chang, C.-L., Gerrity, D., Betancourt, W. Q., & Oh, E. C. (2022). SARS-CoV-2 variant detection at a university dormitory using wastewater genomic tools. *Science of The Total Environment*, 805, 149930. <https://doi.org/10.1016/j.scitotenv.2021.149930>
- Wilton, T., Bujaki, E., Klapsa, D., Majumdar, M., Zambon, M., Fritzsche, M., Mate, R., & Martin, J. (2021). Rapid Increase of SARS-CoV-2 Variant B.1.1.7 Detected in Sewage Samples from England between October 2020 and January 2021. *MSystems*, 6(3), 1–14. <https://doi.org/10.1128/msystems.00353-21>
- Wolfe, M., Hughes, B., Duong, D., Chan-Herur, V., Wigginton, K. R., White, B. J., & Boehm, A. B. (2022). Detection of SARS-CoV-2 Variants Mu, Beta, Gamma, Lambda, Delta, Alpha, and Omicron in Wastewater Settled Solids Using Mutation-Specific Assays Is Associated with Regional Detection of Variants in Clinical Samples. *Applied and Environmental Microbiology*, 88(8), 1–11. <https://doi.org/10.1128/aem.00045-22>
- Wurtz, N., Revol, O., Jardot, P., Giraud-Gatineau, A., Houhamdi, L., Soumagnac, C., Annessi, A., Lacoste, A., Colson, P., Aherfi, S., & Scola, B. La. (2021). Monitoring the Circulation of SARS-CoV-2 Variants by Genomic Analysis of Wastewater in Marseille, South-East France. *Pathogens*, 10(8), 1042. <https://doi.org/10.3390/pathogens10081042>
- Wurtzer, S., Waldman, P., Levert, M., Cluzel, N., Almayrac, J. L., Charpentier, C., Masnada, S., Gillon-Ritz, M., Mouchel, J. M., Maday, Y., Boni, M., Marechal, V., & Moulin, L. (2022). SARS-CoV-2 genome quantification in wastewaters at regional and city scale allows precise monitoring of the whole outbreaks dynamics and variants spreading in the population. *Science of The Total Environment*, 810(152213), 152213. <https://doi.org/10.1016/j.scitotenv.2021.152213>
- Wurtzer, Sebastien, Levert, M., Dhenain, E., Accrombessi, H., Manco, S., Fagour, N., Goulet, M., Boudaud, N., Gaillard, L., Bertrand, I., Challant, J., Masnada, S., Azimi, S., Gillon-Ritz, M., Robin, A., Mouchel, J.-M., Sig, O., & Moulin, L. (2022). From Alpha to Omicron BA.2: New digital RT-PCR approach and challenges for SARS-CoV-2 VOC monitoring and normalization of variant dynamics in wastewater. *Science of The Total Environment*, 848, 157740. <https://doi.org/10.1016/j.scitotenv.2022.157740>
- Yaniv, K., Ozer, E., Shagan, M., Paitan, Y., Granek, R., & Kushmaro, A. (2022). Managing an evolving pandemic: Cryptic circulation of the Delta variant during the Omicron rise. *Science of The Total Environment*, 836, 155599. <https://doi.org/10.1016/j.scitotenv.2022.155599>
- Yu, A. T., Hughes, B., Wolfe, M. K., Leon, T., Duong, D., Rabe, A., Kennedy, L. C., Ravuri, S., White, B. J., Wigginton, K. R., Boehm, A. B., & Vugia, D. J. (2022). Estimating Relative Abundance of 2 SARS-CoV-2 Variants through Wastewater Surveillance at 2 Large Metropolitan Sites, United States. *Emerging Infectious Diseases*, 28(5), 940–947. <https://doi.org/10.3201/eid2805.212488>
